# Cortical lipids containing choline mediate cannabinoid-induced cognitive improvement

Marta Moreno-Rodríguez<sup>1\*</sup>, Jonatan Martínez-Gardeazabal<sup>1</sup>, Iker Bengoetxea de Tena<sup>1</sup>, Alberto Llorente-Ovejero<sup>1</sup>, Laura Lombardero<sup>1</sup>, Estibaliz González de San Román<sup>1</sup>, Lydia Giménez-Llort<sup>2</sup>, Iván Manuel<sup>1,3</sup>, Rafael Rodríguez-Puertas<sup>1,3\*</sup>

<sup>1</sup>Department of Pharmacology, Faculty of Medicine and Nursing. University of the Basque Country (UPV/EHU), Leioa, Spain.

<sup>2</sup>Department of Psychiatry and Forensic Medicine, School of Medicine & Institute of Neuroscience, Autonomous University of Barcelona (UAB), Barcelona, Spain.

<sup>3</sup>Neurodegenerative Diseases, BioBizkaia Health Research Institute, Barakaldo, Spain.

\*Corresponding author email: [rafael.rodriquez@ehu.es](mailto:rafael.rodriquez@ehu.es) [marta.morenor@ehu.es](mailto:marta.morenor@ehu.es)

## ABSTRACT

Recent research connecting choline-containing lipids to basal forebrain cholinergic neurons (BFCN) degeneration in neuropathological states highlights a challenge for balancing lipid integrity with optimal acetylcholine (ACh) levels. Warranting an adequate choline source to maintain ACh levels in this pathway is crucial for preserving memory. The endocannabinoid (eCB) system plays a role in modulating learning and memory processes controlled by cholinergic neurotransmission. Consequently, we propose that activation of this system is neuroprotective against cholinergic degeneration. In the present study, we investigated the neuroprotective effect of a subchronic treatment with the CB<sub>1</sub> cannabinoid agonist, WIN55,212-2, using both *ex vivo* and *in vivo* 192IgG-Saporin models of specific cholinergic damage. Degeneration of baso-cortical cholinergic pathways induced memory deficits and a downregulation of saturated and mono-unsaturated lysophosphatidylcholines (LPC) cortical levels. WIN55,212-2 not only restored memory deficits but also increased cortical ACh levels and modified cortical choline-containing lipids such as sphingomyelins (SM) and LPCs, which are essential for correct memory functioning, in lesioned animals. Given these results, we propose that WIN55,212-2 generates an alternative choline source through the breakdown of SMs, which is enough to increase cortical ACh levels and LPCs. These findings suggest that modification of choline-containing lipids by the activation of CB<sub>1</sub> receptors is a promising therapy for dementia associated with cholinergic dysfunction, such as in Alzheimer's disease (AD).

## INTRODUCTION

The selective vulnerability of basal forebrain cholinergic neurons (BFCN) plays a crucial role in the pathophysiology of dementia in Alzheimer's disease (AD)<sup>1,2</sup>. A significant loss of cholinergic neurons in the nucleus basalis of Meynert and decreased levels of presynaptic cholinergic markers in the neocortex were described, correlating with cognitive decline in AD<sup>3,4</sup>. Currently, the largest class of drugs approved for the treatment of AD are inhibitors of the enzyme acetylcholinesterase to increase acetylcholine (ACh) at the synaptic cleft, however the clinical benefits of these drugs are limited. Therefore, there is a significant need to develop novel drugs to enhance the functionality of the BFCN projection system especially when damage has already occurred<sup>5</sup>. Recently, studies have

40 successfully traced cholinergic pathways *in vivo*, demonstrating that the integrity of these pathways  
41 is disrupted not only in patients with mild cognitive impairment (MCI) and AD, but also in individuals  
42 with subjective cognitive decline<sup>6, 7</sup>. Given the importance of the above-described cholinergic  
43 neurotransmission in AD, animal models of cholinergic dysfunction based on experimental  
44 manipulations of the BFCN have been developed as an appropriate tool to study the memory deficits<sup>8</sup>.  
45 <sup>9</sup>. While the BFCN lesion model does not exhibit the histopathological characteristics of AD such as  
46 neurofibrillary tangles and  $\beta$ A plaques, as seen in genetic models of AD like the 3xTg-AD mouse  
47 model<sup>10</sup>, it provides a valuable tool for exploring treatments targeted at improving cognition after  
48 cholinergic damage has occurred. Cholinergic neurons are unique in their requirement of choline,  
49 which is used to synthesize both choline-containing lipids (i.e., phosphatidylcholine (PC),  
50 lysophosphatidylcholine (LPC), choline plasmalogen, and sphingomyelin (SM)) and their  
51 neurotransmitter, ACh<sup>11, 12</sup>. The recent description of a close association between choline-containing  
52 lipids and BFCN degeneration in AD<sup>13</sup>, suggests that, under pathological conditions, the cholinergic  
53 system may encounter a dilemma, having to choose between preserving the structural integrity of  
54 choline-containing lipids in the membrane and maintaining optimal levels of ACh. Therefore, it is  
55 crucial to understand the vulnerabilities of BFCN and explore novel approaches and pathways to  
56 maintain cholinergic system integrity.

57 The endocannabinoid (eCB) system is a neuromodulator system that plays important roles in learning  
58 and memory processing, distributed in areas of the brain related to cognition<sup>14</sup> and implicated in the  
59 cholinergic neurotransmission<sup>15, 16</sup>. Cannabinoid agonists induce memory impairment<sup>17, 18</sup>, but in the  
60 last decade, evidence has been accumulating showing a beneficial effect of low cannabinoid doses  
61 upon cognitive impairment<sup>19-21</sup>. The role of the cannabinoid system in neurodegenerative diseases is  
62 still unknown; however, increased activity of cannabinoid receptor 1 (CB<sub>1</sub>) has been observed with  
63 disease progression<sup>22</sup>. Additionally, a case report revealed that micro-dosing of cannabinoids  
64 improved mnemonic learning in a patient with AD<sup>23</sup>. Although some studies showed that cannabinoids  
65 modulated the ACh release in the hippocampus and cortex<sup>24-26</sup>, the specific mechanism through which  
66 cannabinoids impact or enhance memory remains unknown.

67 Consequently, to investigate memory deficits and the role of the eCB system in a model of BFCN  
68 degeneration, our group previously employed intraparenchymal injections of the p75<sup>NTR</sup>-binding  
69 192IgG-Saporin toxin into the nucleus basalis magnocellularis (NBM) in rats. The studies showed that  
70 after the lesion, rats showed memory impairment, increased levels of CB<sub>1</sub> receptor activity<sup>27</sup> and  
71 altered levels of choline-containing lipids<sup>28</sup> in both the NBM and cortex. These results suggested that  
72 choline-containing lipids and the eCB system play a key role in the specific degeneration of basal  
73 forebrain-cortical cholinergic circuit. These findings led us to employ cannabinoid agonists as a  
74 therapeutic approach to treat cholinergic deficits.

75 In this study, we have used the mentioned *in vivo* animal model of BFCN degeneration to present  
76 evidence of an alternative cellular source of choline that uses the synthetic cannabinoid WIN55,212-  
77 2 to restore acetylcholine levels, the choline-containing lipids, to induce cognitive improvement.

## 78 **MATERIALS & METHODS**

### 79 **Animals**

80 *Ex vivo* hemibrain organotypic cultures were derived from 25 male Sprague-Dawley rats postnatal day  
81 7 (P7), weighting 14-20 g, and for the *in vivo* experimental model, 121 adult male Sprague-Dawley rats,  
82 weighting 200-250 g, were used for 192IgG-saporin or vehicle administration. All rats were housed in  
83 cages (50 cm length x 25 cm width x 15 cm height), four or five per cage, at 22°C in a humidity-controlled  
84 (65%) room with a 12:12 hour's light/dark cycle, with access to food and water *ad libitum*. 7-month-old  
85 C57BL/6 3xTg-AD mice (n = 17) harboring PS1M146V, APPSwe, and TauP301L genes provided by  
86 Prof. Lydia Giménez-Llort from Universitat Autònoma de Barcelona and age-matched wild-type C57BL/6  
87 (n = 20) from Envigo (Indianapolis, IN, USA) weighing 25-30 g were also used. Mice were housed in  
88 groups of 3-4 per cage at a temperature of 22°C and in a humidity-controlled (65%) room with a 12:12  
89 hours light/dark cycle, with access to food and water *ad libitum*. Every effort was made to minimize the  
90 discomfort of the animals and to use the minimum number of animals. All procedures were performed in  
91 accordance with European animal research laws (Directive 2010/63/EU) and the Spanish National  
92 Guidelines for Animal Laws (RD 53/2013, Law 32/2007). Experimental protocols used in this study were  
93 approved by the Local Ethics Committee for Animal Research of the University of the Basque Country  
94 (CEEA M20-2018-52 and 54).

### 95 ***Ex vivo* model of cholinergic degeneration in organotypic cultures and cannabinoid treatments**

96 P7 Sprague-Dawley rats were sacrificed by decapitation and brains were quickly dissected under aseptic  
97 conditions inside a laminar flow cabinet. The protocol used was described in detail by Llorente-Ovejero  
98 et al.<sup>28</sup>. In brief, approximately 6 slices containing cholinergic neurons within the NBM were obtained  
99 from each brain, and these were immediately transferred into cell culture inserts over membranes of 0.4  
100 µm pore size (PIC50ORG, Millipore, MA, USA), placed in 6-well culture dishes (Falcon, BD Biosciences  
101 Discovery Labware, Bedford, MA) containing cell culture medium. The culture medium consisted in 49%  
102 (v/v) neurobasal medium (NB, Sigma-Aldrich), 24% (v/v) Hanks' balanced salt solution (HBSS, Gibco),  
103 24% (v/v) normal horse serum (NHS, Gibco), 1% (v/v) d-glucose, 0.5% glutamine (Sigma-Aldrich), 0.5%  
104 B27 supplement serum free (Gibco), and 1% antibiotic/antimycotic. The culture plates were incubated at  
105 37°C in a fully humidified atmosphere supplemented with 5% CO<sub>2</sub>. The *ex vivo* hemibrain organotypic  
106 cultures were randomly divided into two groups: In group 1 fresh cell culture medium was added. In  
107 group 2 fresh cell culture medium containing 192IgG-saporin (Millipore Temecula, CA, USA) (100 ng/ml)  
108 was added on days 2 and 5 *in vitro* (DIV). Both groups were treated with WIN55,212-2 (1 nM or 10 nM)  
109 (Sigma-Aldrich, St. Louis, MO, USA) dissolved in ethanol. The maximum final ethanol concentration in

110 culture medium was set at 0.01% (v/v), according to previous reports<sup>29</sup>. To verify receptor specificity of  
111 the effect exerted by the cannabinoid agonist WIN55,212-2, a third group of animals were treated as  
112 those in group 2 with the addition of CB<sub>1</sub> receptor antagonist AM251 (1 μM) (Tocris Bioscience, Bristol,  
113 UK). After 8 DIV, organotypic cultures were incubated in the presence of 5 μg/ml of propidium iodide (PI)  
114 to mark degenerating cells (bright red) for 2 h prior to fixation with paraformaldehyde.

### 115 ***In vivo* rat model of basal forebrain cholinergic degeneration and cannabinoid treatments**

116 Basal forebrain cholinergic degeneration was induced following bilateral stereotaxic (−1.5 mm  
117 anteroposterior from Bregma, ±3 mm mediolateral from midline, +8 mm dorsoventral from cranial  
118 surface) injection of 192IgG-saporin (130 ng/μl) into the NBM, as previously described<sup>27</sup>. Control rats  
119 received an injection of artificial cerebrospinal fluid (aCSF) into the NBM. Rats were allowed to recover  
120 from surgery for 7 days. On day 8, we initiated treatments and training on the Barnes maze (BM) and  
121 novel object recognition test (NORT), as described below.

122 In the BM performance, aCSF and 192IgG-SAP groups received intraperitoneal (ip) injections of  
123 WIN55,212-2 (0.5 mg/kg or 3 mg/kg) (Sigma-Aldrich, St. Louis, MO, USA) or vehicle solution (1:1:18;  
124 DMSO:Kolliphor: saline) for five consecutive days, 1 h prior to the performance of the task. To verify  
125 receptor specificity of the cannabinoid effect, another group of animals received an ip injection of  
126 WIN55,212-2 (0.5 mg/kg) along with CB<sub>1</sub> receptor antagonist SR141716A (0.5 mg/kg, ip) (Tocris  
127 Bioscience, Bristol, UK). Rats were randomly selected for each group: aCSF (n = 8); aCSF +W0.5 (n=7);  
128 aCSF +W3 (n=6); aCSF +SR (n=6); 192IgG-SAP (n=8); 192IgG-SAP+W0.5 (n=7); 192IgG-SAP+W3  
129 (n=6); 192IgG-SAP+W+SR (n=6); 192IgG-SAP+SR (n=6).

130 In the NORT performance, WIN55,212-2 (0.5 mg/kg, ip, 5 days) was administered daily for five  
131 consecutive days, 1 h before each phase of the behavioral test. The following groups of rats were used:  
132 control group aCSF (n=10), aCS+WIN0.5 (n=10), 192IgG-saporin (n=10), 192IgG-SAP+W0.5 group  
133 (n=10). Animals were sacrificed three days after the last WIN55,212-2/SR141716A/vehicle  
134 administration.

### 135 **WIN55,212-2 administration in the 3xTg-AD mouse model of familial AD**

136 Given that the loss of basal forebrain cholinergic projections is an early feature of AD, we studied if the  
137 same cannabinoid treatment would also be beneficial in an animal model of familial AD, the 3xTg-AD  
138 mouse, which shows the histopathological hallmarks of the disease<sup>30</sup>. WIN55,212-2 (0.1 mg/kg,  
139 equivalent to 0.5 mg/kg in rats, ip, 5 days)<sup>31</sup> was administered daily for five consecutive days, 1 h before  
140 each phase of BM test to 3xTg-AD and age-matched wild-type C57BL/6 mice. The following groups of  
141 animals were used: control group (WT, n=10), WIN55,212-2 (0.1 mg/kg) group (WT+WIN0.1, n=10),  
142 3xTg-AD group (3xTg-AD, n=8) and 3xTg-AD + WIN55,212-2 (0.1 mg/kg) group (3xTg-AD+WIN0.1,  
143 n=9).

144 **Barnes maze**

145 The maze was performed using two white circular platforms, one for rats (130 cm of diameter, 100 cm  
146 from the floor, 20 holes 10 cm each and 2.5 cm between holes) and one for mice (92 cm of diameter,  
147 100 cm from the floor, 20 holes 5 cm each and 2.5 cm between holes). Only one of the holes leads to a  
148 dark chamber located under it. Two bright lights (400 W, approximately 1310 luxes light condition) and  
149 visual cues were placed around the platform. Each rodent was placed in the middle of the maze and was  
150 allowed to explore the maze for 3 minutes. If a rodent did not reach the target hole in the given 3 minutes,  
151 it was gently guided to it. During 4 days of training, rodents conducted 4 trials per day, with 15 minutes  
152 between trials. During the training days, total latency (the time to reach the target hole) was measured.  
153 A gradual decrease in this parameter over the 4 training days is indicative of spatial memory. On day 5,  
154 the target hole was closed and rodents were allowed to explore the maze for 3 minutes. As an additional  
155 measure of spatial memory, time in the target quadrant (the quadrant where the target hole was located)  
156 was measured. The maze was cleaned using a 10% ethanol solution after every trial. All the procedures  
157 were analyzed by SMART 3.0 video tracking software (Panlab Harvard apparatus, Barcelona, Spain).

158 **Novel object recognition test**

159 The test was performed in a white open-field arena (90 × 90 × 50 cm) (Panlab S.L., Barcelona, Spain) in  
160 a room under one lux light condition. A video camera placed above the shuttle box recorded the behavior  
161 of the rats. The test was divided into four distinct phases that were carried out throughout five days:  
162 habituation phase (3 days), familiarization phase, short-term testing (5 h after familiarization) and long-  
163 term testing (24 h after familiarization). Before each phase, rats were transported to the experimental  
164 room for about 10 min and each rat was gently handled individually for 1 min, having its neck and back  
165 stroked by the experimenter's fingers, before entering the arena. After leaving the arena, rats were gently  
166 handled again. Habituation phase lasted for 3 days and consisted in placing rats in the arena to allow  
167 them to explore the compartment for 5 min. In the familiarization phase, which was carried out on the  
168 fourth day, rats were presented with two identical objects (object A and object A), built with five to six  
169 mega bloks, with a height of about 10 cm. The objects were positioned diagonally in opposite corners of  
170 the arena, approximately 10 cm away from their respective walls, and were mirror images of each other.  
171 To avoid possible bias regarding the location of the objects, these were rotated after the familiarization  
172 phase of each rat. A 25 s exploration threshold for both objects combined was established and rats  
173 remained in the arena until that threshold was met. If rats failed to reach the 25 s exploration threshold  
174 in 15 min, they were excluded from the study. Exploration of the objects was considered when the rats  
175 touched the object or faced it with their nose being less than 2 cm away from it. 5 h after the familiarization  
176 phase, short-term testing was performed. In that phase, rats were again placed in the arena and were  
177 presented with one of the familiar objects (object A) and with a new object (object B). Rats were given 5  
178 min to explore the objects. 24 h after the familiarization phase, on the fifth day, long-term testing was  
179 performed. Rats were again placed in the arena and were presented with the familiar object (object A)



180 and a third, new object (object C). Rats were given 5 min to explore the objects. In the first habituation  
181 phase, which is equivalent to an open field test, the total path length of the rats and their speed were  
182 measured using an automated tracking system (SMART, Panlab S.L., Barcelona, Spain) as indicators  
183 of exploratory behavior. In the short and long-term testing phases, the amount of time dedicated to  
184 exploring the familiar and new objects was measured and the object discrimination ratio (DR) was  
185 calculated using the following formula:  $DR = [(Novel\ Object\ Exploration\ Time - Familiar\ Object\ Exploration\ Time) / Total\ Exploration\ Time]$ . A higher DR was indicative of more time exploring the new  
186 object compared to the familiar one and was thus considered a positive performance in the test (good  
187 recognition memory). DR scores approaching zero reflect no preference for the new object and negative  
188 scores indicate preference for the familiar object, which reflect impairment of recognition memory in both  
189 cases. Moreover, the total exploration time spent by the rats in short- and long-term testing phases was  
190 measured to investigate the effect of the different model or the drugs administered on object exploration.  
191

## 192 **Tissue Preparation**

193 Organotypic cultures on day 8 were gently and extensively rinsed with 0.9% saline solution (37°C)  
194 followed by immersion in 4% paraformaldehyde and 3% picric acid in 0.1M PB (4°C) for 1 h. Animal  
195 groups which performed the BM, on day 15 after the lesion, were anesthetized with ketamine/xylazine  
196 (90/10 mg/kg; ip) and sacrificed by decapitation or transcranial perfused to obtain fresh or fixed tissue,  
197 respectively. Fresh brains from experimental groups (n=96) were quickly removed by dissection, fresh  
198 frozen, and kept at -80 °C. Later, brains were cut into 20 µm coronal sections using a Microm HM550  
199 cryostat (Thermo Scientific, Waltham, MA, USA) equipped with a freezing-sliding microtome at -25 °C  
200 and mounted onto gelatin-coated slides and stored at -25 °C until used. Animals from experimental  
201 groups (n=25) were transcardially perfused with 50 mL of warm (37 °C), calcium-free Tyrode's solution  
202 (0.15 M NaCl, 5 mM KCl, 1.5 mM MgCl<sub>2</sub>, 1 mM MgSO<sub>4</sub>, 1.5 mM NaH<sub>2</sub>PO<sub>4</sub>, 5.5 mM glucose, 25 mM  
203 NaHCO<sub>3</sub>; pH 7.4), 0.5% heparinized, followed by 4% paraformaldehyde and 3% picric acid in 0.1 M  
204 phosphate buffer (PB) (4 °C) (100 mL/100 g, bw) (37 °C, pH 7.4). Brains were removed and placed in a  
205 cryoprotective solution consisting of 20% sucrose in PB overnight at 4 °C, and frozen by immersion in  
206 isopentane and kept at -80 °C. Brains were cut into 12 µm coronal sections as described above,  
207 mounted onto gelatin-coated slides and stored at -25 °C until used for the immunofluorescence assays.

## 208 **Immunofluorescence**

209 Organotypic culture sections were blocked and permeabilized with 4% normal goat serum (NGS) with  
210 0.6% Triton X-100 in PBS (0.1 M, pH 7.4) for 2 h at 4°C. The incubation was performed using the free-  
211 floating method at 4°C (48 h) with rabbit anti-p75<sup>NTR</sup> (1:500; Cell signaling, MA, USA) with 0.6% Triton X-  
212 100 in PBS with 5% BSA. The primary antibody was then revealed by incubation for 30 min at 37°C in  
213 darkness with donkey anti-rabbit Alexa 488 (1:250; Thermo Scientific, Waltham, MA, USA) with Triton  
214 X-100 (0.6%) in PBS. For the processing of fixed rat tissue, 12 µm coronal sections were blocked and  
215 permeabilized with 3% donkey serum with 0.25% Triton X-100 PBS (0.1 M, pH 7.4) and 2 h later they

216 were labeled with mouse anti-Iba1 (1:500; Fujifilm Wako Chemicals, VA, USA) or rabbit anti-p75<sup>NTR</sup>  
217 (1:750; Cell signaling, MA, USA) overnight. After several washes, the appropriate secondary antibody  
218 (1:200) was applied (Donkey anti-rabbit Alexa fluor-488 for p75<sup>NTR</sup> and donkey anti-mouse Alexa fluor-  
219 555 for Iba1; Thermo Scientific, Waltham, MA, USA) for 2 h. Controls of immunofluorescence consisted  
220 in primary antibody omission resulting in the absence of immunoreactivity.

### 221 **Cells quantitation**

222 In organotypic cultures, 200-fold magnification photomicrographs of the BFCNs within the NBM were  
223 acquired by means of an Axioskop 2 Plus microscope (Zeiss) equipped with a CCD imaging camera  
224 (SPOT Flex Shifting Pixel). Both p75<sup>NTR</sup> immunoreactive and PI positive cells were stereologically  
225 counted and the total number of cells in the whole image was reported. The population of p75<sup>NTR</sup>  
226 immunoreactive or PI-stained cells was expressed as p75<sup>NTR</sup> or PI cells/mm<sup>2</sup>. In rat tissue, 200-fold  
227 magnification photomicrographs of NBM in both hemispheres were randomly acquired by Axioskop 2  
228 Plus microscope (Carl Zeiss) equipped with a CCD imaging camera SPOT Flex Shifting Pixel. p75<sup>NTR</sup>  
229 immunoreactive positive cells were stereologically counted at three different stereotaxic levels (-1.20  
230 mm, -1.56 mm and -1.92 mm from Bregma), in 6 different rats per group and the total number of cells in  
231 the whole image was obtained. The density of cholinergic cells was expressed as p75<sup>NTR</sup> positive  
232 cells/mm<sup>3</sup>. Iba1 immunoreactive positive cells were counted at stereotaxic level -1.56 mm from Bregma,  
233 in 3 different rats per group and the total number of cells in the whole image was obtained. The number  
234 of Iba1 positive cells was expressed as cells/mm<sup>2</sup>.

### 235 **MALDI-MSI**

236 Matrix-assisted laser desorption/ionization mass spectrometry imaging (MALDI-MSI) was performed  
237 using fresh 20 µm sections for each sample. MBT matrix was deposited on the tissue surface by  
238 sublimation. The sublimation was performed using 300 mg of MBT, and the deposition time and  
239 temperature were controlled (23 min, 100°C). For the recrystallization of the matrix, the sample was  
240 attached to the bottom of a glass Petri dish face-down, which was placed on another Petri dish containing  
241 a methanol-impregnated piece of filter paper on its base. The Petri dish was then placed on a hot plate  
242 (1 min, 38 °C)<sup>32</sup>. A MALDI LTQ-XL-Orbitrap (Thermo Fisher Scientific, San Jose, CA, USA) equipped  
243 with a nitrogen laser (λ = 337 nm, rep rate = 60 Hz, spot size = 80 µm × 120 µm) was used for mass  
244 analysis. Thermo's ImageQuest software was used to analyze MALDI-MSI data and image acquisition  
245 in positive ion mode. The used range was 400–1000 Da with 10 laser shots per pixel at a laser fluence  
246 of 15 µJ. The target plate stepping distance was set at 150 µm for both x- and y-axes by the MSI image  
247 acquisition software. The data were normalized using the total ion current values. Each of the m/z values  
248 was plotted for signal intensity for each pixel (mass spectrum) across a given area (tissue section) using  
249 MSiReader software<sup>33</sup>. The m/z range of interest was normalized using the ratio of the total ion current  
250 for each mass spectrum. The data were expressed as absolute intensity in arbitrary units. The  
251 assignment of lipid species was facilitated using the databases Lipid MAPS (<http://www.lipidmaps.org/>)

252 and the Human Metabolome Database (HMDB) (<https://hmdb.ca>). 5 ppm mass accuracy was selected  
253 as the tolerance window for the assignment.

### 254 [<sup>35</sup>S]GTP $\gamma$ S autoradiography

255 Fresh 20  $\mu$ m slices from all experimental groups were dried, followed by two consecutive incubations in  
256 HEPES-based buffer (Sigma-Aldrich, St. Louis, MO, USA) (50 mM HEPES, 100 mM NaCl, 3 mM MgCl<sub>2</sub>,  
257 0.2 mM EGTA and 0.5% BSA, pH 7.4) for 30 min at 30°C to remove endogenous ligands. Then, slices  
258 were incubated for 2 h at 30°C in the same buffer but supplemented with 2 mM GDP, 1 mM DTT,  
259 adenosine deaminase (3 Units/l) (Sigma-Aldrich, St. Louis, MO, USA) and 0.04 nM [<sup>35</sup>S]GTP $\gamma$ S (1250  
260 Ci/mmol, PerkinElmer, Boston MA, USA). Basal binding was determined in two consecutive slices in the  
261 absence of the agonist. The agonist-stimulated binding was determined in another consecutive slice with  
262 the same reaction buffer, but in the presence of the corresponding receptor agonists, CP55,940 (10  $\mu$ M)  
263 (Sigma-Aldrich, St. Louis, MO, USA) for CB<sub>1</sub> receptor receptors and carbachol (100  $\mu$ M) for M<sub>2</sub>/M<sub>4</sub>  
264 receptors. Non-specific binding was defined by competition with non-radioactive GTP $\gamma$ S (10  $\mu$ M) (Sigma-  
265 Aldrich, St. Louis, MO, USA) in another section. Then, slices were washed twice in cold (4°C) 50 mM  
266 HEPES buffer (pH 7.4), dried and exposed for 48h to  $\beta$ -radiation sensitive film with a set of [<sup>14</sup>C]  
267 standards (American Radiolabeled Chemicals, St. Louis, MO, USA) calibrated for [<sup>35</sup>S].

### 268 Histochemistry for AChE detection

269 Fresh 20  $\mu$ m slices from all experimental groups were air dried and post-fixed with 4% paraformaldehyde  
270 for 30 min at 4°C. Slices were rinsed twice in 0.1 M Tris-maleate buffer (pH 6.0) for 10 min and incubated  
271 in the AChE reaction buffer: 0.1 M Tris-maleate; 5 mM sodium citrate; 3 mM CuSO<sub>4</sub>; 0.1 mM iso-OMPA;  
272 0.5 mM K<sub>3</sub>Fe(CN)<sub>6</sub> and 2 mM acetylthiocholine iodide (Sigma-Aldrich, St. Louis, MO, USA) as reaction  
273 substrate. The incubation time to stain cholinergic fibers was 100 min. The enzymatic reaction was  
274 stopped by two consecutive washes (2x10 min) in 0.1 M Tris-maleate (pH 6.0). Slices were then  
275 dehydrated in increasing concentrations of ethanol and covered with DPX as the mounting medium.  
276 Finally, the stained slices were scanned at 600 ppi resolution, the images were converted to 8-bit gray-  
277 scale mode and AChE positive fiber density was quantified by Image J software (NIH, Bethesda, MD,  
278 USA). Software measured the optical density (O.D.) of AChE reactivity in each anatomical area.

### 279 Choline/Acetylcholine assay

280 Choline and acetylcholine were quantified in rat cortical tissue from all experimental groups using a  
281 choline/acetylcholine assay kit (ab65345, Abcam, Cambridge, UK). 10 mg of cortical fresh tissue were  
282 harvested, washed in cold PBS and resuspended in 500  $\mu$ L of choline assay buffer. The tissue was  
283 homogenized with a homogenizer (Heidolph RZR 50 Homogenizer 300-2000 RPM w/ Barnant 50001-  
284 92 Stand 115V), sitting on ice, with 10 – 15 passes. Samples were centrifuged at 4°C for 5 minutes  
285 (Eppendorf 5417R Refrigerated Centrifuge) at 16,400 rpm. Supernatants were collected and used with  
286 the choline/acetylcholine assay buffer. The assay was carried out in accordance with the manufacturer's



287 instructions, in the absence and presence of acetylcholinesterase to identify values of total and free  
288 choline, which allowed an indirect quantification of acetylcholine. The relative sample fluorescence was  
289 determined using Varioskan LUX Reader (Thermo Scientific, Waltham, MA, USA).

### 290 **Rat brain cortex incubation**

291 10 mg of fresh cortical tissue were harvested, washed in cold PBS and resuspended in 500  $\mu$ L of choline  
292 assay buffer. The tissue was homogenized with a homogenizer (Heidolph RZR 50 Homogenizer 300-  
293 2000 RPM w/ Barnant 50001-92 Stand 115V), sitting on ice, with 10 – 15 passes. The samples were  
294 incubated in choline assay buffer at 37 °C and collected every 15 minutes, for 2 h. After incubation,  
295 samples were centrifuged at 4°C for 5 minutes (Eppendorf 5417R Refrigerated Centrifuge) at 16,400  
296 rpm. Supernatants were collected to use them with the choline/acetylcholine assay buffer and dry pellets  
297 were analyzed by MALDI-MS.

### 298 **Cortical sample preparation for MALDI-MS**

299 Cortical lipid composition was analyzed in all experimental groups by MALDI-MS. Dry pellets from rat  
300 cortical tissue from all experimental groups were obtained and the protein concentration was determined  
301 using the Bradford method. Samples were reconstituted with water at the same concentration. A mixed  
302 sample (3  $\mu$ L of sample and 7  $\mu$ L of matrix-saturated solution of MBT) was deposited on a MALDI plate  
303 containing 96 wells, using the dried droplet method. Xcalibur software was used for MALDI data  
304 acquisition in both positive and negative ion modes. The positive ion range was 400–1000 Da, and the  
305 negative ion range was 400–1100 Da, with 3 minutes of shots per well at a laser fluence of 15  $\mu$ J. The  
306 m/z range of interest was normalized using the ratio of the total ion current for each mass spectrum. The  
307 data were expressed as absolute intensity in arbitrary units. The assignment of lipid species was  
308 facilitated using the databases Lipid MAPS (<http://www.lipidmaps.org/>) and the Human Metabolome  
309 Database (HMDB) (<https://hmdb.ca>). 5 ppm mass accuracy was selected as the tolerance window for  
310 the assignment.

### 311 **Statistical analysis**

312 Data are expressed as mean  $\pm$  SEM. Data evaluated across the groups used Kruskal-Wallis test followed  
313 by Dunn's *post hoc* tests for multiple comparisons. Spearman rank for correlations (SigmaPlot 12.5) and  
314 false discovery rate were used to adjust for multiple comparisons between correlations. Statistical  
315 significance was set at  $p < 0.05$  (two-tailed). Statistics and data were graphically represented using  
316 GraphPad Prism 9 (GraphPad Software). The heat map generation was performed using the freely  
317 available software program Heatmapper (<http://www.heatmapper.ca/>).

## 318 **RESULTS**

### 319 **WIN55,212-2 protects cell viability after BFCN degeneration in organotypic culture**

320 Propidium iodide (PI) uptake was quantified as a measure of cell death in NBM after 192IgG-saporin  
321 and different cannabinoid treatments in rat postnatal day 7 (P7) hemibrain organotypic cultures. *Ex*  
322 *vivo* culture application of 100 ng/ml of the toxin 192IgG-saporin at days two and five produced a  
323 significant increase in the density of PI-stained cells (PI<sup>+</sup> cells /mm<sup>2</sup>; Control: 14.22 ± 2 vs 192IgG-  
324 saporin: 63.3 ± 7, \*\**p*<0.01. Supplementary Figure 1 A, C). Pre-treatment of organotypic cultures with  
325 either 1 nM or 10 nM of WIN55,212-2, 2h prior to the application of 192IgG-saporin, induced protective  
326 effects on cell viability (192IgG-SAP: 63.3 ± 7 vs 192IgG-SAP+W [10 nM]: 17.78 ± 7, #*p*<0.05.  
327 Supplementary Figure 1 A, C). p75<sup>NTR+</sup> cells in the same area were counted as specific marker of  
328 cholinergic neuron. The application of the immunotoxin at days two and five led to a statistically  
329 significant decrease in the density of cholinergic cells in NBM (p75<sup>NTR+</sup> cells /mm<sup>2</sup>; aCSF: 61.87 ± 4  
330 vs 192IgG-SAP: 26.22 ± 7, \**p*<0.05. Supplementary Figure 1 B, C), while pre-treatment of cultures  
331 with both doses of WIN55,212-2, 2h prior to the application of the toxin, did not change p75<sup>NTR+</sup> cells  
332 number. Although WIN55,212-2 did not specifically protect cholinergic cell viability, it induced a  
333 secondary protective effect in the viability of the whole cell population of the organotypic cultures.

### 334 **WIN55,212-2 restored spatial and recognition memory on an *in vivo* model of cholinergic** 335 **degeneration**

336 Rats received bilateral intraparenchymal injections of 192IgG-saporin into the region containing the  
337 NBM and were subsequently tested for memory performance on the BM and NORT tests. As  
338 WIN55,212-2 did not provide protection to cholinergic neurons in the *ex vivo* experiments, a single  
339 dose of WIN55,212-2 was administered for five consecutive days starting on day eight once the lesion  
340 had stabilized.

341 In the BM, a progressive reduction in the total latency of the experimental groups indicates proper  
342 memory function during the acquisition training (Figure 1 A). In probe day, lesioned animals spent  
343 significantly less time in the target quadrant compared to control group (Time in the target quadrant  
344 (s); aCSF: 91.41 ± 3 vs 192IgG-SAP: 49.22 ± 3, \*\*\**p*<0.001, Figure 1 B and C), showing memory  
345 impairment after toxin administration. The administration of both doses of WIN55,212-2 (0.5 and 3  
346 mg/kg) after the BFCN lesion increased the time in the target quadrant, reaching control levels (aCSF:  
347 91.41 ± 3, 192IgG-SAP+W0.5: 86.82 ± 5, 192IgG-SAP+W3: 90.64 ± 9, Figure 1 C). Co-treatment with  
348 SR141617A, a specific CB<sub>1</sub> receptor antagonist, blocked WIN55,212-2 cognitive improvement,  
349 indicating that cognitive restoration was mediated by the activation of CB<sub>1</sub> receptor. Interestingly, the  
350 high dose of WIN55,212-2 produced opposite effects: cognitive function was improved in lesioned  
351 rats, while it was impaired in control rats (Figure 1 C). The findings of a reduced time spent in the  
352 target quadrant of control group following the administration of 3 mg/kg of WIN55,212-2 supports the  
353 classic detrimental effects of cannabinoid agonists on memory, while the beneficial effect of both  
354 doses on lesioned rats suggests a biphasic effect of cannabinoids on cognition.

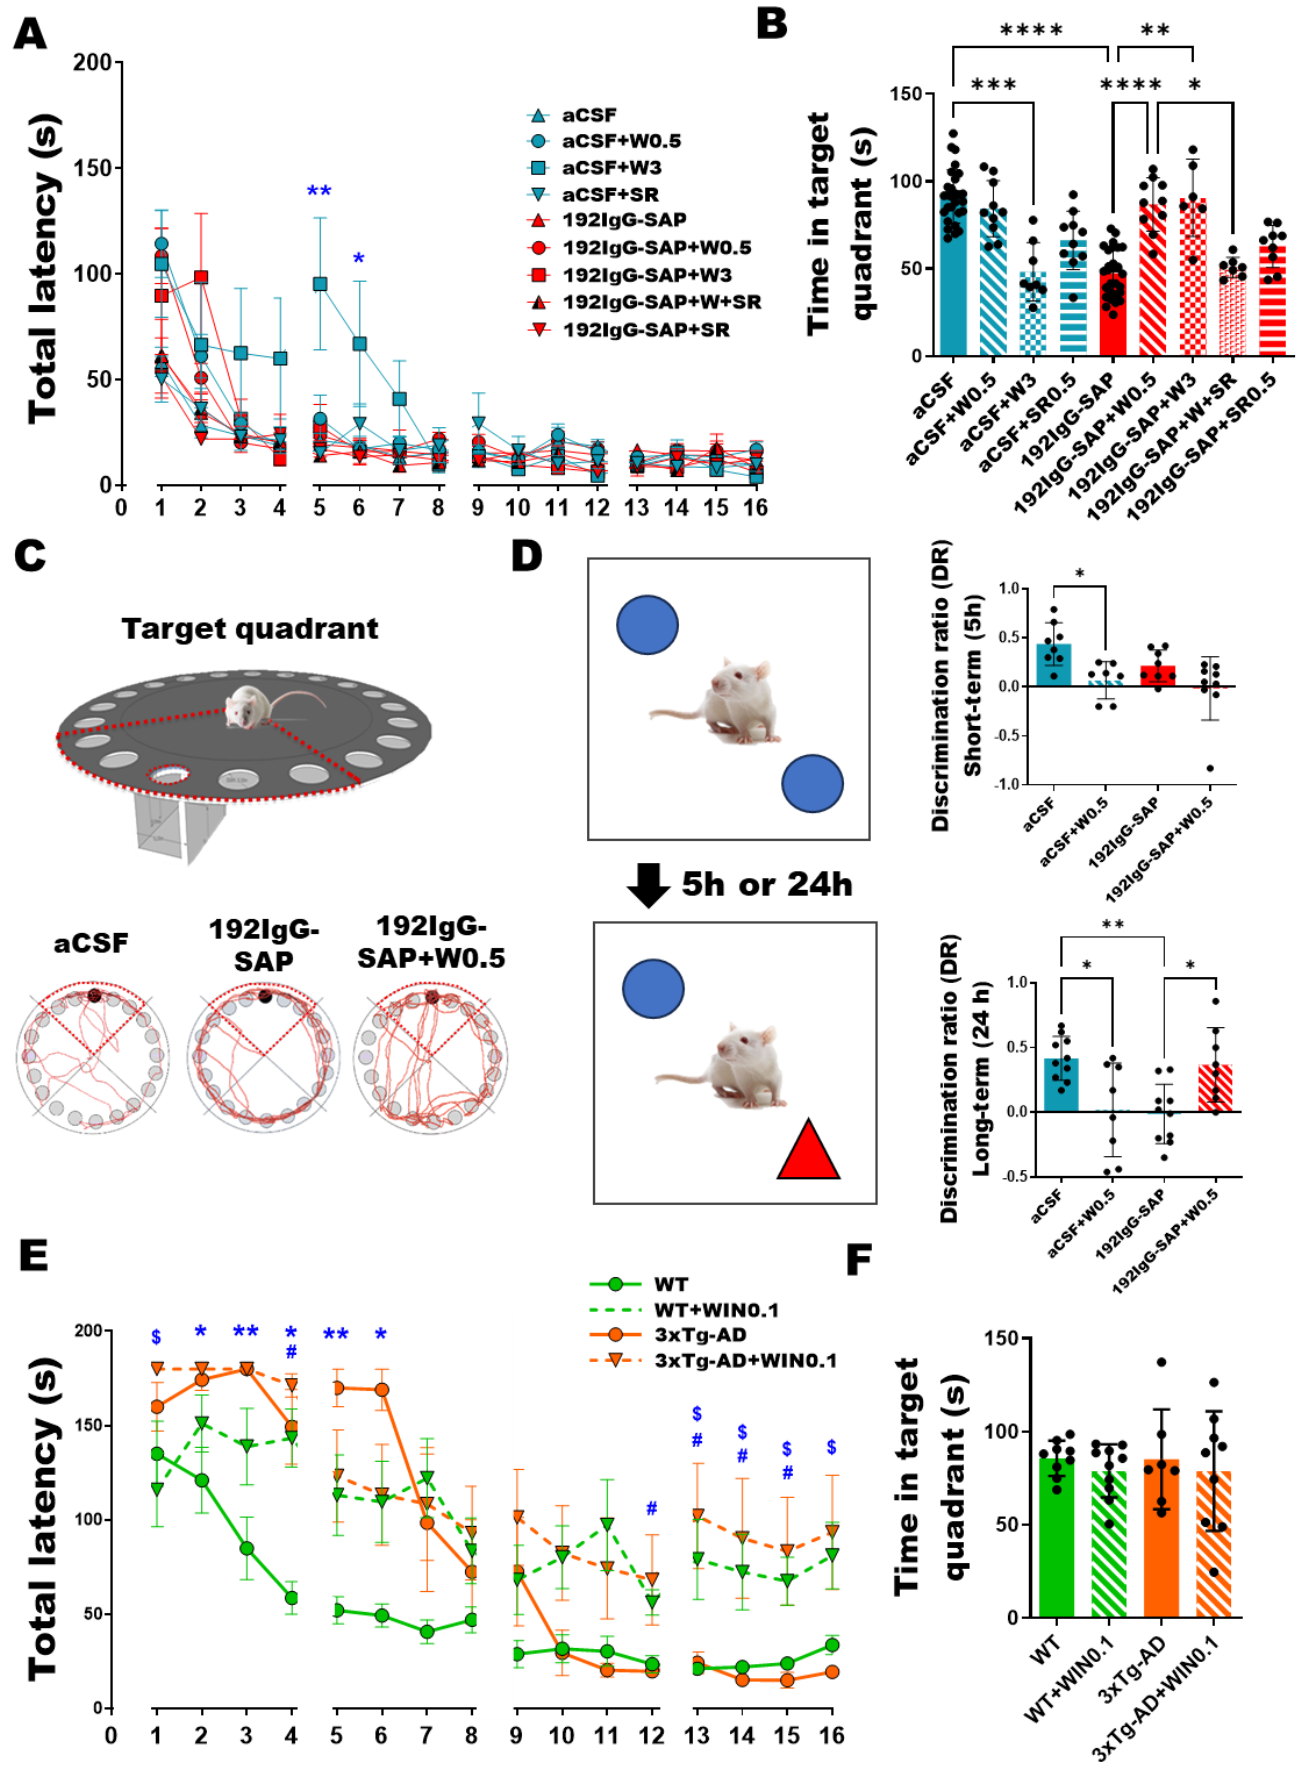

356 **Figure 1. WIN55,212-2 improved cognitive impairment evaluated by BM and NORT following BFCN**  
357 **lesion.** (A). Analysis of the total latency, which is the time spent by the rats to reach the target hole  
358 during 16 trials throughout 4 days for all the groups (B). Time in target quadrant of the rats on day 5,  
359 which is the time spent in the target quadrant. aCSF, aCSF+W0.5, 192IgG-SAP+W0.5 and 192IgG-  
360 SAP+W3 spent more time in target quadrant than the rest of experimental groups. (C) Image of the  
361 Barnes Maze with the target quadrant delineated in red and the trajectories of aCSF, 192IgG-SAP and  
362 192IgG-SAP+W0.5 groups. (D) On the left a scheme depicting a simplified version of the protocol  
363 followed for the performance of NORT. On the right total exploration time of the objects in the short-term  
364 and the long-term for aCSF, aCSF +W0.5, 192IgG-SAP and 192IgG-SAP+W0.5 (E) The total latency of  
365 WT, WT+WIN0.1, 3xTg-AD and 3xTg-AD+WIN0.1 groups (F) Analysis of the time spent in the target  
366 quadrant of the mice from WT, WT+WIN0.1, 3xTg-AD and 3xTg-AD+WIN0.1 groups in BM test on probe  
367 trial day. No significant differences were observed between the groups, indicating that all four groups  
368 performed well in the test on probe trial day. (Kruskal–Wallis test, *post-hoc* test Dunn's multiple  
369 comparison \*\*\* $p < 0.001$ ).

370 To complete this study, we employed the most effective dose from the BM, 0.5 mg/kg, to analyze the  
371 discrimination ratio in NORT in both the short-term (5 h post-familiarization with the objects) and the  
372 long-term (24 h post-familiarization). In the short-term, the subchronic treatment with WIN55,212-2  
373 impaired memory in control rats (Figure 1 D), as already observed with the high dose 3 mg/kg in the  
374 BM. The short-term recognition memory was relatively preserved in 192IgG-SAP group. In the long-  
375 term test, WIN55,212-2 clearly impaired recognition memory in control rats as measured by a  
376 decrease in the DR, while 192IgG-SAP caused a significant decrease in the DR in the long-term  
377 (aCSF  $0.42 \pm 0.05$  vs 192IgG-SAP  $0.06 \pm 0.07$ ,  $p < 0.01$ ; Figure 1 D), indicating recognition memory  
378 impairment following the depletion of BFCNs in the long-term, but not in the short-term. Importantly,  
379 the administration of WIN55,212-2 to lesion rats improved memory in NORT test in the long-term,  
380 increasing the DR to control levels (SAP  $0.06 \pm 0.07$  vs SAP+WIN0.5  $0.38 \pm 0.13$ ,  $p < 0.05$ ; Figure 1  
381 D), consistent with the observations in the BM test and further indicating a different effect of  
382 cannabinoid agonists on memory depending on the cognitive status of the subject.

383 Finally, we investigated whether the same cannabinoid treatment would also yield benefits in an  
384 animal model of familial AD, the 3xTg-AD mouse, in the BM. WIN55,212-2 was administered to both  
385 wild-type (WT) and 3xTg-AD mice at a dose of 0.1 mg/kg, equivalent to 0.5 mg/kg in rats<sup>31</sup>. The time  
386 to reach the target hole during each trial showed significant differences between the groups. On day  
387 4 of the acquisition phase, both WT and 3xTg-AD mice showed reduced total latencies, indicating a  
388 correct learning process for both phenotypes, which was significantly slower for 3xTg-AD mice,  
389 suggesting mild spatial cognitive deficits at 7 months of age in this AD model. WIN55,212-2  
390 administration in the WT induces a deleterious effect on learning, while in 3xTg-AD mice, the  
391 treatment did not reverse the observed cognitive deficits (Figure 1 E). In the probe trial, which is the  
392 greatest indicator of positive performance in this test, no statistically significant differences were  
393 observed between groups, suggesting an absence of spatial memory deficits in the four groups  
394 (Figure 1 F). Consequently, we decided to focus the study in the rat model of BFCN degeneration.

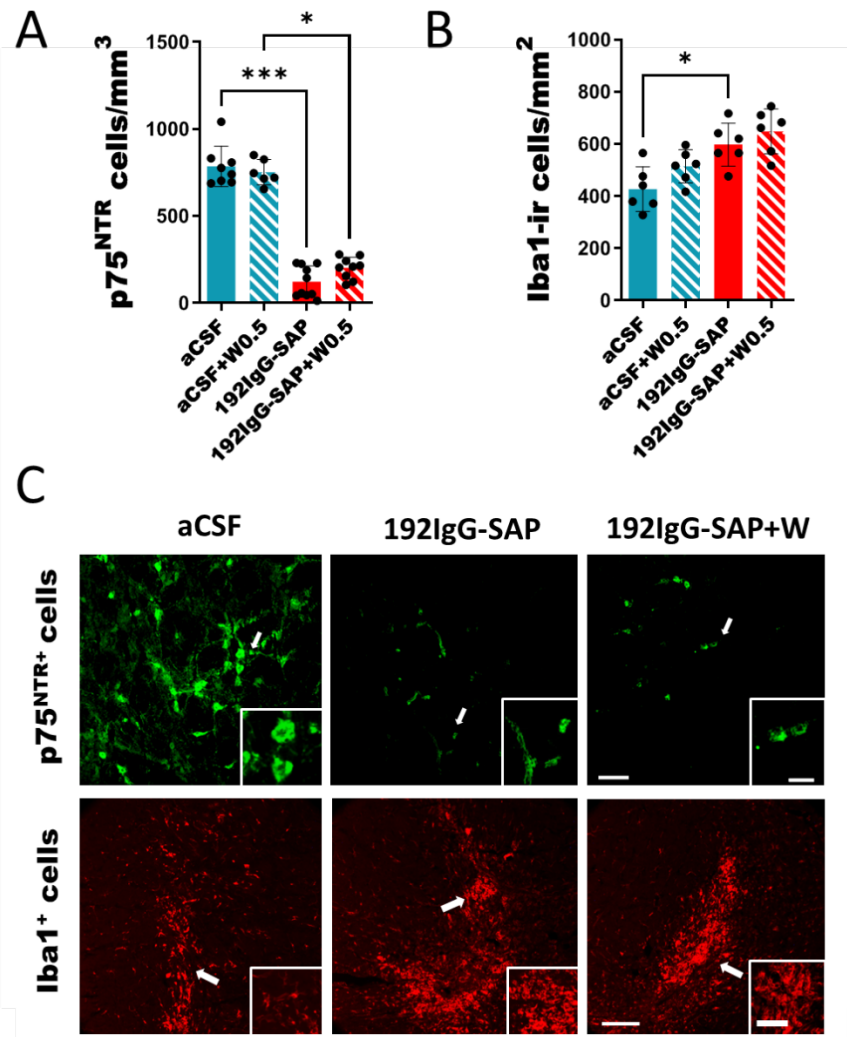

395

396 **Figure 2. Immunofluorescent studies of (A) p75<sup>NTR</sup> and (B) Iba1 positive cells of aCSF, 192IgG-**  
 397 **SAP, aCSF +W and 192IgG-SAP+W groups in the NBM. (C) Labeling images of p75<sup>NTR</sup> positive**  
 398 **cells (green) and Iba1 positive cells (red) of aCSF, 192IgG-SAP and 192IgG-SAP+W (0.5 mg/kg)**  
 399 **group. Note that 192IgG-SAP group had less p75<sup>NTR</sup> positive cells (cholinergic cells) but had more**  
 400 **Iba1 positive cells (microglia). WIN55,212-2 treatment did not modify cell number. Scale bar 100 μm**  
 401 **(inset 50 μm) for p75<sup>NTR</sup> and scale bar 100 μm (inset 25 μm) and Iba1 images. (Kruskal–Wallis test,**  
 402 **post-hoc test Dunn's multiple comparison \**p*<0.05 vs aCSF. Iba1: n=3; p75<sup>NTR</sup>: n=8).**

403 **WIN55,212-2 did not modify the glial response following the 192IgG-saporin administration**

404 Glial activation following a lesion of the NBM was analyzed in aCSF, 192IgG-SAP, aCSF+W0.5 and  
 405 192IgG-SAP+W0.5 groups. Following 192IgG-saporin administration, quantification revealed that the  
 406 number of p75<sup>NTR</sup>+ cells decreased significantly (p75<sup>NTR</sup> cells/mm<sup>3</sup>; aCSF: 786 ± 42 vs 192IgG-SAP:  
 407 123 ± 30, \*\*\**p*<0.001, Figure 2 A, C), while the number of Iba1 positive cells increased (Iba1  
 408 cells/mm<sup>2</sup>; aCSF: 477 ± 41 vs 192IgG-SAP: 636 ± 30, \**p*<0.05. Figure 2 B, C). After WIN55,212-2  
 409 administration, the number of p75<sup>NTR</sup> or Iba1 positive cells at the lesion site were not modified (Figure  
 410 2 A-C).



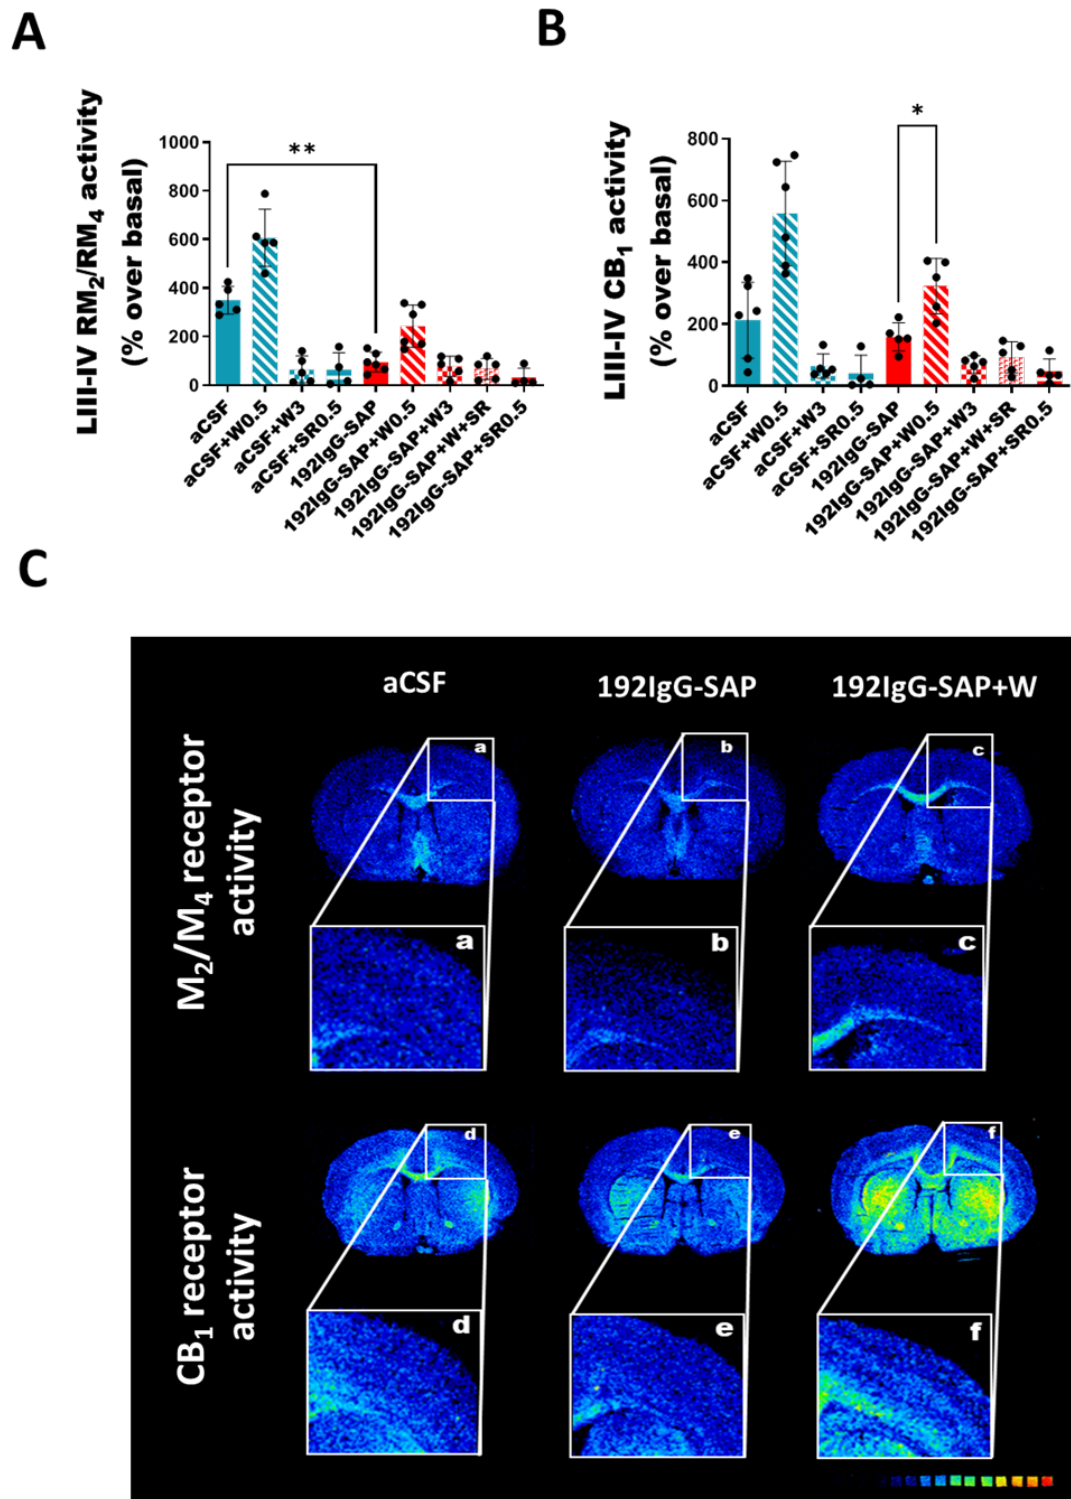

411

412 **Figure 3. Functional autoradiographic studies of mAChR M<sub>2</sub>/M<sub>4</sub> and CB<sub>1</sub> receptor in cortical**  
 413 **areas of all the experimental groups. (A).** Graph of mAChR M<sub>2</sub>/M<sub>4</sub> and CB<sub>1</sub> receptor of all the  
 414 experimental groups in layers III-IV of the cortex. Scale bar = 4 mm. (Kruskal–Wallis test, *post-hoc*  
 415 test Dunn's multiple comparison \*\*\**p*<0.001 (B). Representative autoradiographic images of brain  
 416 coronal sections of mAChR M<sub>2</sub>/M<sub>4</sub> and CB<sub>1</sub>R of aCSF, 192IgG-SAP and 192IgG-SAP+W0.5. Note  
 417 that 192IgG-SAP+W0.5 group has same activity levels of mAChR M<sub>2</sub>/M<sub>4</sub> and CB<sub>1</sub> receptor than aCSF  
 418 group.

419 Given the anti-inflammatory properties of cannabinoids and to describe potential changes in microglial  
420 phenotype or activation states<sup>34</sup>, microglial inflammation-associated lipid biomarkers in the same  
421 experimental groups were evaluated by MALDI-MSI (Supplementary Table 1). Following the lesion,  
422 a significant increase of lysophosphatidylcholines (LPC) C18 and C16 (LPC 18:0 a.u.; Control: 55207  
423  $\pm$  13922 vs 192IgG-SAP: 144700  $\pm$  19651, LPC 16:0 a.u.; Control: 13808  $\pm$  3085 vs 192IgG-SAP:  
424 51672  $\pm$  14782; \* $p$ <0.05), sphingomyelin (SM 34:1 a.u.; Control: 14531  $\pm$  4591 vs 192IgG-SAP: 38556  
425  $\pm$  4956; \* $p$ <0.05) and palmitoyl (CAR 16:0) and oleoyl carnitine (CAR 18:1) levels were described at  
426 the lesion site (CAR 16:0; Control: 9893  $\pm$  4149 vs 192IgG-SAP: 65156  $\pm$  8637; CAR18:1; Control:  
427 8120  $\pm$  5517 vs 192IgG-SAP: 421720  $\pm$  93521; \* $p$ <0.05), while C32-phosphatidylcholines (PC 32:0),  
428 showed a non-significant reduction. This lipidomic analysis showed that lipids associated to microglial  
429 inflammatory response increased at the lesion site. As an example, SM 34:1, which is restricted to  
430 the choroid plexus in physiological conditions, was detected at the lesion site following immunotoxin  
431 administration. Acyl-carnitines, which were only slightly detected in control rats, significantly increased  
432 in the lesion site following administration of the immunotoxin (Supplementary Figure 2). These results  
433 indicate that WIN55,212-2 administration did not restore these inflammation-associated lipids to  
434 control levels. Together with the results from the immunohistochemical studies showing unaltered  
435 number of microglial cells following the cannabinoid treatment, these results indicate that the  
436 subchronic administration of WIN55,212-2 did not significantly modify the post lesion microglia-  
437 associated inflammatory response in the NBM.

#### 438 **WIN55,212-2 increased cortical muscarinic and cannabinoid receptor activity**

439 The activity elicited by CB<sub>1</sub> and muscarinic M<sub>2</sub>/M<sub>4</sub> receptors (mAChR M<sub>2</sub>/M<sub>4</sub>) was analyzed in NBM,  
440 hippocampus and the cortex. The lesion selectively reduced the mAChR M<sub>2</sub>/M<sub>4</sub> activity in layers III-  
441 IV of the cortex (mAChR M<sub>2</sub>/M<sub>4</sub> of LIII-IV (% over the basal): aCSF: 350  $\pm$  25; 192IgG-SAP: 105  $\pm$  60;  
442 192IgG-SAP+W: 242  $\pm$  30, \* $p$ <0.05. Figure 3 A, C); with no observed effects in the NBM or  
443 hippocampus (Supplementary Figure 3). Conversely, low doses of WIN55,212-2 increased CB<sub>1</sub>  
444 receptor activity in lesion animals in the same cortical layers ((% over the basal): 192IgG-SAP: 230  $\pm$   
445 70 vs 192IgG-SAP+W: 378  $\pm$  21, # $p$ <0.05. Figure 3 A, B).

#### 446 **WIN55,212-2 modified cortical acetylcholinesterase activity, acetylcholine and choline levels**

447 We measured acetylcholinesterase (AChE) activity, as well as ACh and choline (Ch) levels in the  
448 cortex in all the experimental groups. AChE activity in the cortex decreased after the lesion (AChE  
449 activity a.u.; aCSF: 17  $\pm$  1 vs 192IgG-SAP: 8.4  $\pm$  1, \* $p$ <0.001). Unexpectedly, the low/high doses of  
450 WIN55,212-2, as well as SR141716A, reversed the downregulation of AChE activity induced by the  
451 toxin (Figure 4 A, B).

452 Free cortical Ch levels (pmol) were increased in aCSF+W0.5 groups (aCSF: 721  $\pm$  21 vs aCSF+W0.5:  
453 798  $\pm$  23, Figure 4 C) compared with the aCSF group. Additionally, cortical ACh levels showed a

454 tendency to increase in the 192IgG-SAP+W0.5, but a significant increase was observed in the  
 455 192IgG-SAP+W3 group compared to 192IgG-SAP (192IgG-SAP:  $58 \pm 6$ , 192IgG-SAP+W0.5:  $96 \pm 8$   
 456 and 192IgG-SAP+W0.5:  $158 \pm 19$ ) (Figure 4 D). This pattern suggests a dose-response effect.

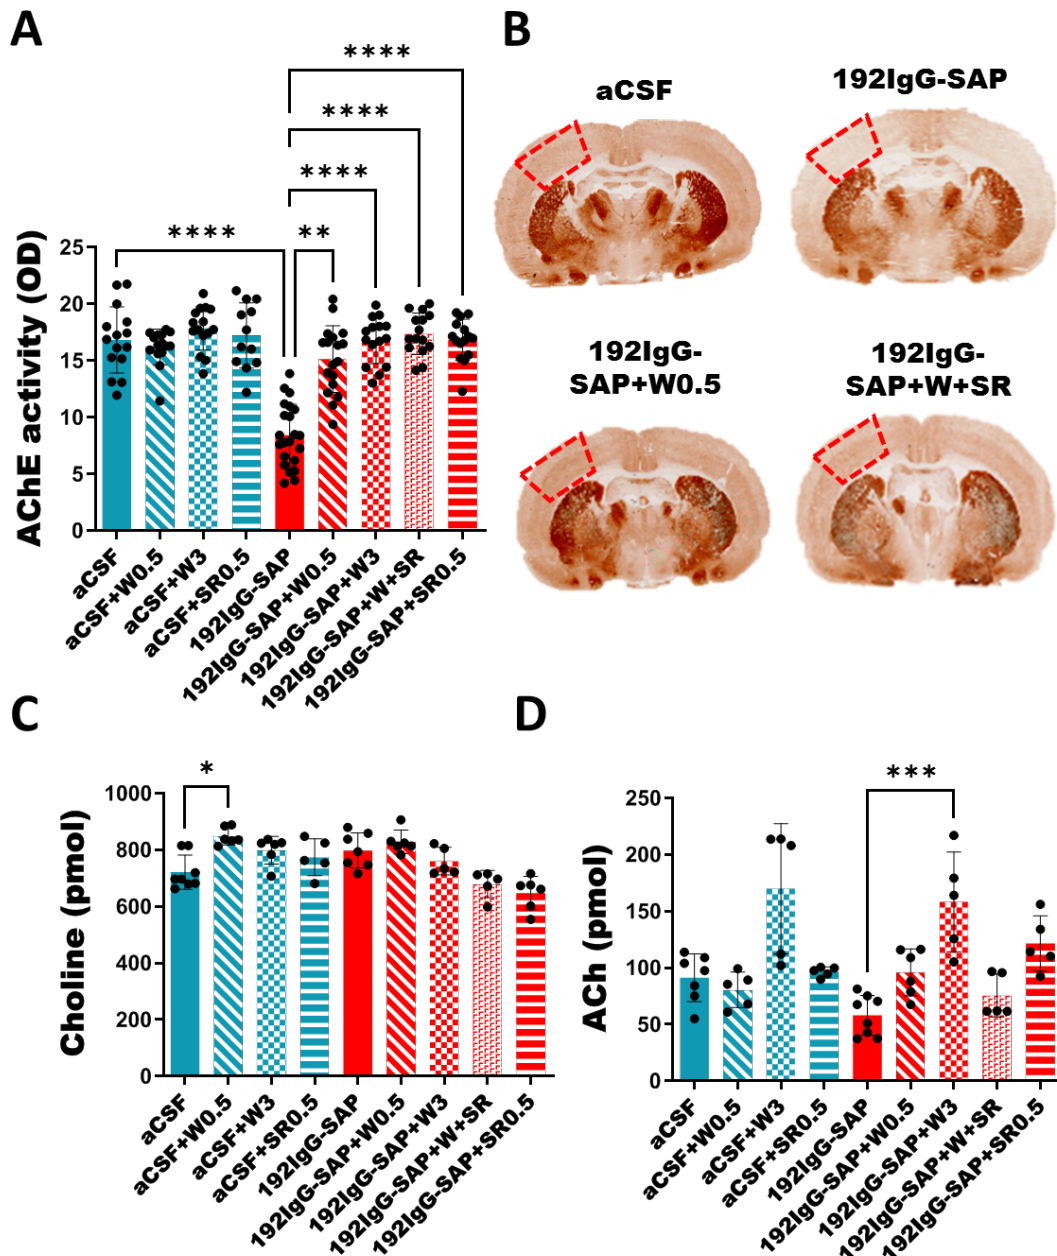

457

458 **Figure 4. Cortical acetylcholinesterase (AChE) activity, choline (Ch) acetylcholine (ACh) and**  
 459 **levels in all the experimental groups. (A).** Boxplot of cortical AChE activity levels in all the  
 460 experimental groups. (B). Representative images from coronal sections of AChE enzymatic staining  
 461 from aCSF, 192IgG-SAP, 192IgG-SAP+W0.5 and 192IgG-SAP+W+SR groups. Note that  
 462 WIN55,212-2 restores AChE cortical levels in the lesion animals (C). Boxplot of cortical choline levels  
 463 in all the experimental group. (D). Boxplot of cortical choline levels in all the experimental groups.  
 464 (Kruskal–Wallis test, *post-hoc* test Dunn's multiple comparison. \*\*\* $p < 0.001$ .)

465

466

## 467 **WIN55,212-2 modified cortical lipid homeostasis**

468 Cortical lipidomic analysis following WIN55,212-2 administration revealed more pronounced changes  
469 in lipid homeostasis compared to the impact of the cholinergic lesion alone (Figure 5 A). After the  
470 lesion, cortical saturated and mono-unsaturated lysophosphatidylcholine (LPC) levels (e.g., LPC 16:0  
471 +K<sup>+</sup>, LPC 18:0 +K<sup>+</sup> and LPC 18:1 +K<sup>+</sup>) were significantly reduced. There was also a reduction of two  
472 phosphatidylcholines (PC) (PC 38:2 and PC O-38:7) and an increase in phosphatidylethanolamine  
473 (PE) (PE 38:5).

474 Lipidomic changes in 192IgG-SAP+W group, which displayed cognitive improvement after the lesion,  
475 revealed decreased arachidonic acid (AA) containing-phosphatidylcholines (PC) and  
476 phosphatidylethanolamines (PE) (e.g., PC 18:1\_20:4 +K<sup>+</sup>, PC 16:0\_20:4 +K<sup>+</sup>, PE 18:0\_20:4 +H<sup>+</sup>, PE  
477 18:1\_20:4 +K<sup>+</sup>) and increased docosahexaenoic acid containing-phosphatidylcholines (DHA-PC),  
478 (e.g., PC 40:7 (18:1\_22:6) +K<sup>+</sup> and PC 40:6 (18:0\_22:6) +K<sup>+</sup>). In addition, low doses of WIN55212-2  
479 increased very long-chain sulfatides (e.g., SHexCer (d18:1\_22:0)<sup>-</sup>, SHexCer (d18:1\_24:1)<sup>-</sup>) and  
480 hexoceramides (HexCer 36:1 +K<sup>+</sup>) and decreased sphingomyelins (e.g., SM 36:1 +K<sup>+</sup>, SM 36:2 +K<sup>+</sup>,  
481 SM 38:1 +K<sup>+</sup>, SM 38:2 +K<sup>+</sup>). Furthermore, low doses of WIN55,212-2, increased LPCs to control  
482 levels. Interestingly, LPCs were the only lipids that correlated with behavioral parameters following  
483 BM testing in aCSF, 192IgG-SAP, 192IgG-SAP+W and 192IgG-SAP+W+SR groups, suggesting that  
484 LPCs are key players in the cognitive improvement seen in 192IgG-SAP+W animals (Figure 5 B). To  
485 identify the lipid precursor associated with LPC upregulation, correlations between lipid levels in  
486 192IgG-SAP and 192IgG-SAP+W groups were performed. We found negative correlations with LPCs  
487 and SMs across groups, suggesting that increased LPCs are generated by SMs downstream  
488 pathway(s) (Figure 5 C).

## 489 ***In vitro* cortical SMs breakdown degradation produces increases in choline and LPCs**

490 To better characterize the metabolic pathway linking LPCs, SMs, and choline, rat brain cortex tissue  
491 was incubated in a specific buffer to measure choline levels. Membrane lipids were then studied in  
492 the same sample after incubation using MALDI mass spectrometry. After a 2 h incubation, progressive  
493 diminution of some SM and increased levels of LPCs were found (Figure 6 A), as well as an increase  
494 in the choline levels (Figure 6 B). Notably, cortical tissue incubation replicated the same lipid changes  
495 observed after the WIN55,212-2 treatment *in vivo*. Here we report a strong correlation between  
496 ceramides/hexoceramides and choline levels, practically with a 1:1 ratio (Figure 6 C, D). SM  
497 degradation results in ceramide and phosphocholine, which is converted to choline (Figure 6 E),  
498 suggesting that the observed increase in choline found in the *in vitro* assay is related to the breakdown  
499 of SM. Moreover, LPCs increased conversely to SMs, in line with the observed changes seen after  
500 WIN55,212-2 treatment *in vivo*, further supporting the existence of this metabolic pathway which, in  
501 the *in vivo* model, is potentiated following CB<sub>1</sub> receptor activation. To the best of our knowledge, our



502 findings support for the first time that SM 36:1 is one of the alternative sources to produce choline,  
 503 the precursor needed to produce the neurotransmitter acetylcholine and LPCs, respectively.

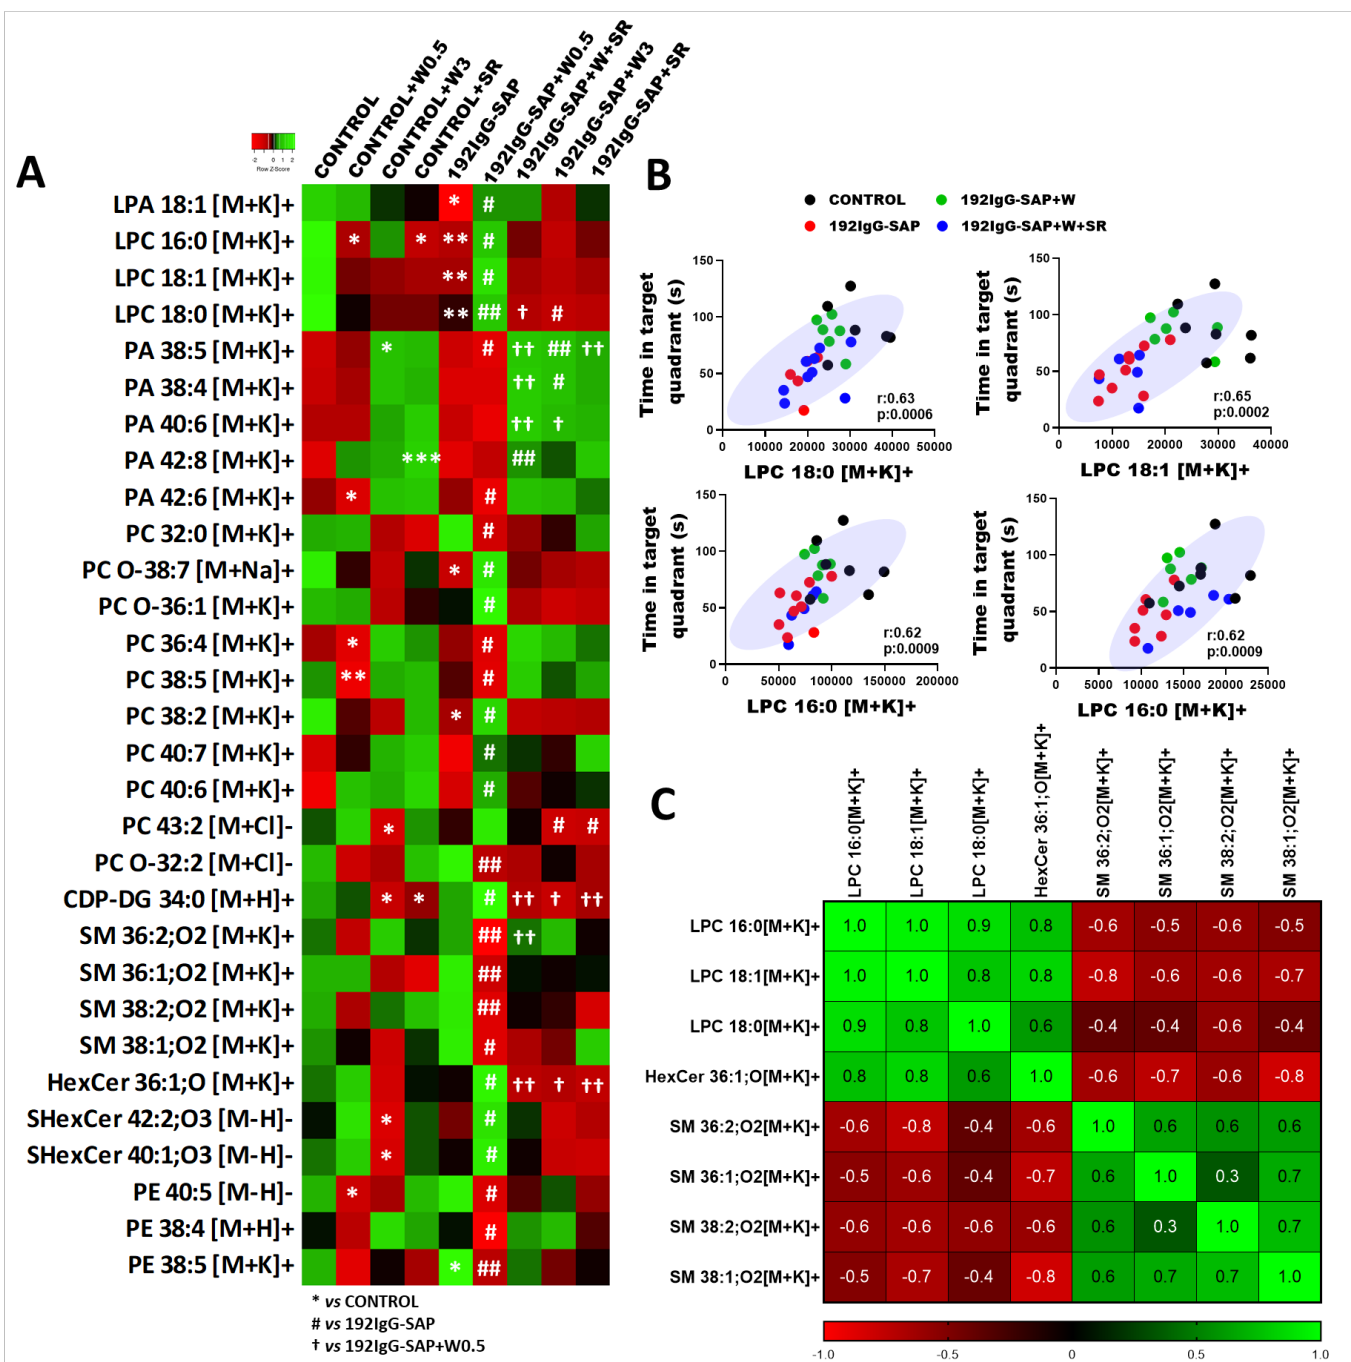

504

505 **Figure 5. Cortical targeted lipidomic analysis.** (A). Heatmap highlighting the 30 most differentially  
 506 expressed lipid species between the different groups following the lesion or WIN55,212-2 treatment  
 507 (Kruskal–Wallis test, *post-hoc* test Dunn's multiple comparison \*\*\* $p < 0.001$ ). (B). Linear regression  
 508 showing significant correlations between LPC 18:0, LPC 18:1, LPC 16:0 and LPA 18:0, and time in  
 509 target quadrant on day 5 of Barnes maze (Spearman's rank correlation coefficient  $r_s$  and  $p$ ). (C). Matrix  
 510 correlation between 192IgG-SAP and 192IgG-SAP+W, showing  $r_s$  values of Spearman's correlations.  
 511 Note the strong positive correlation between LPCs and HexCer, and the opposite correlation between  
 512 LPC and SMs.



A

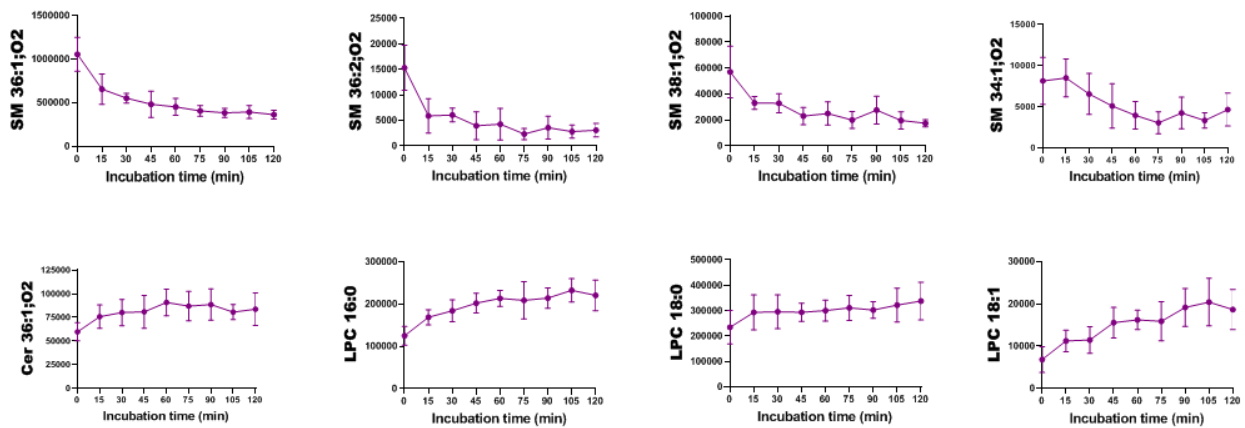

B

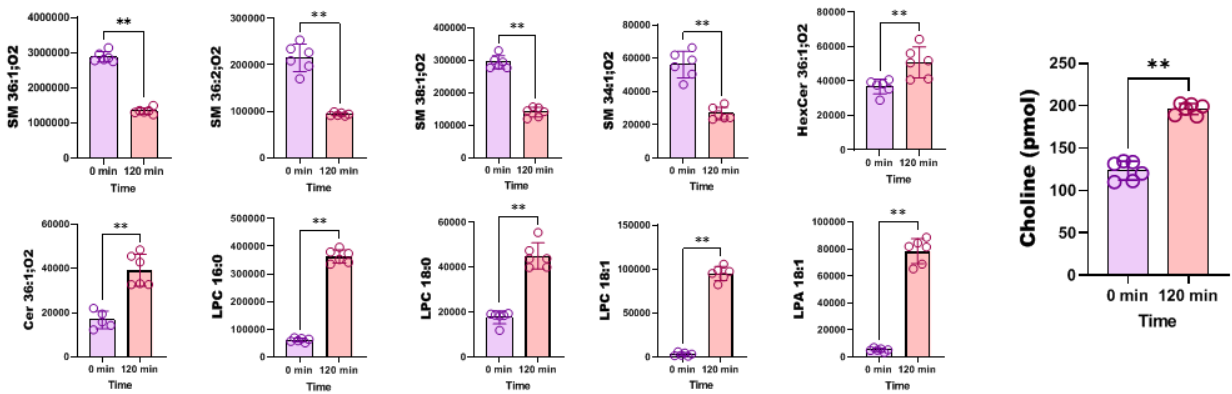

C

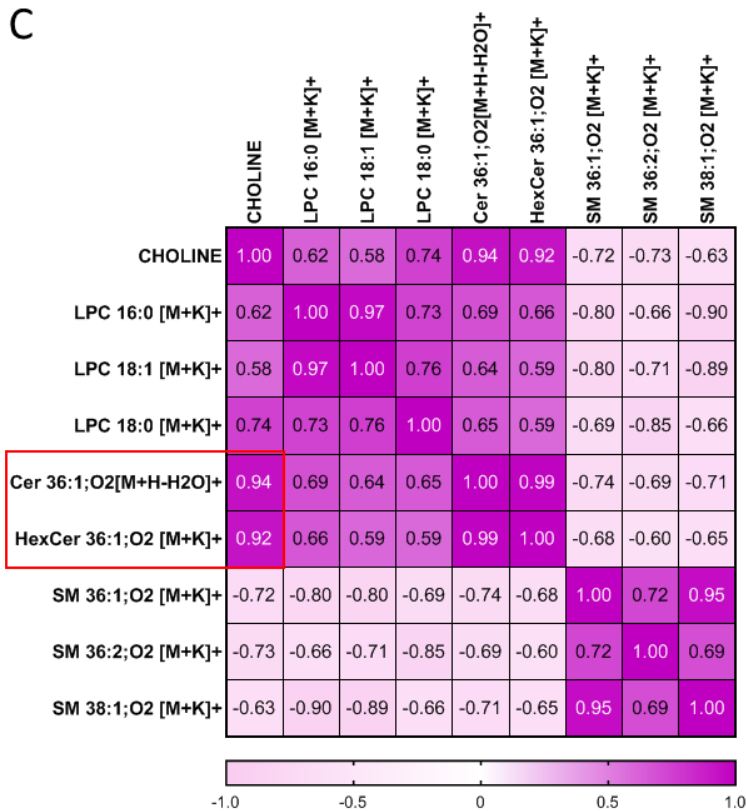

D

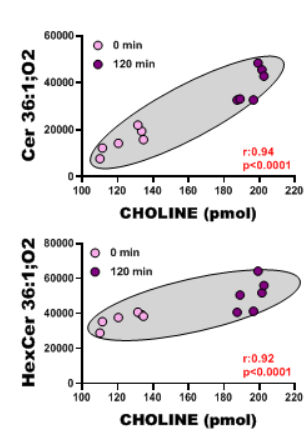

E

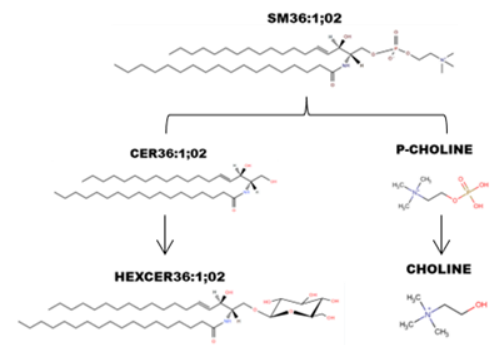

514 **Figure 6. Choline production in brain cortex homogenates from control rats. (A).** Line graphs of  
515 lipid production (LPCs) or degradation (SMs) in rat brain cortex homogenates over time ( $n=8$ , each  
516 time). **(B).** Box plot of changes on cortical lipids and choline after 2 h of incubation (Mann-Whitney  
517 test, Time 0 vs Time 120 min,  $n=6$ ). **(C).** Correlation matrix between the LPCs, SMs and choline,  
518 showing  $r_s$  values of Spearman's correlations,  $n=6$ . Note that choline and Cer/HexCer showed strong  
519 positive correlation. **(D).** Linear regression shows significant correlations between Cer/HexCer and  
520 choline levels at time 0 and 120 min (Spearman's rank correlation coefficient  $r_s$  and  $p$ ). **(E).**  
521 Degradation of sphingomyelins. Degradation of SMs generates ceramide and p-choline.  
522 Glycosylation of ceramide generates HexCer and dephosphorylation P-choline generates choline.  
523 Note that the same SMs and LPCs whose levels are modulated by WIN55,212-2 in the cortex of lesion  
524 rats change after incubation over time.

525

## 526 DISCUSSION

527 The role that the eCB system plays in restoring cognitive impairment is an active area of research. Here  
528 we report *ex vivo* and *in vivo* data demonstrating that a low dose of the CB<sub>1</sub> receptor agonist WIN55,212-  
529 2, improves cognition, following a lesion of the cholinergic neurons located in the NBM.

530 In the *ex vivo* study, application of 192IgG-saporin to P7 hemibrain organotypic cultures produced a  
531 significant cell death and specifically induced a loss of cholinergic neurons. Our results suggest that the  
532 application of the toxin triggers a partial loss of BFCN which leads to secondary cell damage, as  
533 demonstrated by the elevated levels of PI uptake. The established understanding is that p75<sup>NTR</sup> facilitates  
534 the retrograde transport of both neurotrophins and the monoclonal antibody coupled to saporin from  
535 axon terminals<sup>35</sup>. This mechanism elucidates the depletion of BFCN subsequent to the uptake of saporin  
536 when administered intraventricularly *in vivo*<sup>36</sup>. In line with previous studies, the injection of the neurotoxin  
537 192IgG saporin into the NBM *in vivo* resulted in a loss of p75<sup>NTR</sup> neurons and cognitive impairment fifteen  
538 days post lesion<sup>27, 28</sup>. The administration of 192IgG-saporin produced a profound impairment of spatial,  
539 recognition and contextual memory in BM and NORT test, more pronounced in the long-term. The NBM  
540 primarily projects to the frontal, parietal, and temporal cortex. However, the tasks used here in BM and  
541 NORT also involve the hippocampus and associated cortical structures<sup>37, 38</sup>. We previously reported that  
542 no differences were observed in the hippocampus in terms of acetylcholinesterase (AChE) staining one  
543 week after the BFCN lesion<sup>28</sup>, providing evidence of the absence of nonspecific damage in other basal  
544 forebrain cholinergic projection pathways. This implies that the memory impairment observed in both BM  
545 and NORT mainly reflects the baso-cortical cholinergic damage.

546 Considering that the loss of cholinergic projections from the basal forebrain is an early pathological  
547 feature of clinical symptoms associated to dementia in AD<sup>39, 40</sup>, we extended our investigation to an  
548 animal model of familial AD, the 3xTg-AD mouse<sup>30</sup>. At 7 months, 3xTg-AD mice are at the onset of AD  
549 pathology, with cognitive functions already affected at this age<sup>41, 42</sup>. However, despite the moderate  
550 cognitive impact observed in 3xTg-AD mice at this stage, the BM, characterized as one of the most  
551 suitable tests for detecting cognitive deficits in this model at an early age<sup>43</sup>, did not reveal strong memory

552 impairment. 3xTg-AD mice showed a prolonged learning curve as compared with matched wild-types,  
553 showing a delay in the spatial learning curve of this genotype at this age and no positive effects were  
554 observed following the treatment with the CB<sub>1</sub> receptor agonist. Moreover, the time spent in the target  
555 quadrant, which is the main indicator to measure the acquired spatial memory in the test, was unaffected  
556 by genotype. Although the basal forebrain cholinergic system is affected early in this model<sup>44</sup>, it did not  
557 show significant memory deficits at least at this age and in this test. The focus of this study is to identify  
558 a treatment that specifically reverses memory impairment once severe cholinergic damage and memory  
559 deficits are already present. This makes the BFCN degeneration rat model a more valuable tool for  
560 investigating treatments against memory impairments induced by cholinergic deficits, thus, we decided  
561 to continue the neuropharmacological study using this rat model.

562 After successfully establishing our cholinergic lesion model *ex vivo* and also *in vivo* showing memory  
563 impairment after basal forebrain–cortical cholinergic circuits damage, we decided to initially test various  
564 doses of WIN55,212-2 in the *ex vivo* setting. The treatment of organotypic cultures with WIN55,212-2,  
565 pre-192IgG-saporin administration, showed protective effect against secondary cell death. Other authors  
566 previously demonstrated the WIN55,212-2 protective effect<sup>45-47</sup>. However, we found a non-significant  
567 impact specifically on the survival of cholinergic neurons. Nevertheless, those protective effects against  
568 secondary cell death *ex vivo* led us to administer the cannabinoid treatment in the *in vivo* lesion model  
569 following the occurrence of cholinergic cell loss. Thus, WIN55,212-2 would prove beneficial after the  
570 cholinergic damage has already taken place, i.e., when clinical cognitive symptoms arouse during  
571 neurodegenerative diseases.

572 The ip administration of a low dose (0.5 mg/kg) of WIN55,212-2 restored cognitive impairment on the *in*  
573 *vivo* model of BFCN degeneration on both BM and NORT. The recovery effect was mediated by CB<sub>1</sub>  
574 receptors since co-administration of WIN55,212-2 with the specific CB<sub>1</sub> receptor antagonist SR141716A  
575 blocked cognitive recovery. In addition, a high dose (3 mg/kg) of WIN55,212-2 had opposite effects  
576 depending on the treatment group including impaired memory in controls, while improving learning in  
577 lesioned animals in the BM. Similar effects were observed in NORT with the dose of 0.5 mg/kg. The  
578 administration of 0.5 mg/kg to the control rats impaired memory in the NORT, whereas it improved  
579 cognition in lesioned animals. It is widely accepted that cannabinoid agonism induces memory  
580 impairment, especially short-term memory<sup>17, 48, 49</sup>. Although numerous studies explore the role of  
581 cannabinoids in the impairment of spatial memory<sup>50-54</sup>, there are no studies conducted with cannabinoid  
582 agonism in rats using the BM. Meanwhile, studies in NORT test revealed that doses of WIN55,212-2  
583 between 0.3-1.2 mg/kg are enough to completely impair short-term memory storage and different stages  
584 of long-term recognition memory<sup>55, 56</sup>. However, studies have reported either a biphasic effect of  
585 cannabinoid agonism on cognition<sup>20</sup>, or a beneficial effects of low as opposed to high doses<sup>57, 58</sup>. These  
586 results suggest that the dual effects of cannabinoids on cognition depend on several factors, more

587 specifically, the status of the baso-cortical cholinergic pathway, as previously demonstrated by the  
588 cognitive status of the subjects<sup>19</sup>. Another important factor may be the inflammation status induced by  
589 intraparenchymal administration of 192IgG-saporin<sup>59</sup>, and the anti-inflammatory properties<sup>60</sup> of  
590 cannabinoids would be able to reduce it.

591 Although we found post toxin injection an increase in the number of Iba1 positive cells (microglia) in the  
592 region containing the NBM<sup>61</sup>, the anti-inflammatory properties of WIN55,212-2<sup>62, 63</sup> did not modify the  
593 number of microglia cells. Since there are multiple microglial phenotypes, it is difficult to perform an  
594 extensive analysis based on protein markers<sup>64</sup>. Instead, we used MALDI-MSI to identify inflammatory  
595 lipid patterns. Blank et al.<sup>34</sup>, measured lipid profiles of lipopolysaccharide (LPS)-stimulated and  
596 unstimulated microglia-like cells and identified 21 potential inflammation-associated lipid markers.  
597 Inflammation-associated lipid markers studied by MALDI-MSI in the 192IgG group showed an increase  
598 in various lipids within the lesion site (e.g., LPC 18:0, LPC 16:0, SM 34:1 and palmitoyl/oleoyl-carnitines,  
599 CAR 16:0, CAR 18:1), but not in the control group. Following the ip administration of low doses of  
600 WIN55,212-2 in the 192IgG-SAP group, lipids did not decrease to control levels, indicating that  
601 WIN55,212-2 did not change either the number or the phenotype of microglia found at the lesion site.  
602 While several studies show that cannabinoid administration reduces inflammatory activity of microglia *in*  
603 *vitro*<sup>65-67</sup>, no significant anti-inflammatory effect was observed following WIN55,212-2 administration with  
604 the dose and treatment protocol used in the present animal model. Considering the potential significance  
605 of the cholinergic system's previous condition in the baso-cortical pathway for the positive impact of  
606 WIN55,212-2, and given the established interaction between the cholinergic and eCB systems<sup>68, 69</sup>, our  
607 study focused on analyzing how WIN55,212-2 affects or modulates the baso-cortical cholinergic  
608 pathway.

609 We found a decrease in cortical M<sub>2</sub>/M<sub>4</sub> receptor activity and AChE activity after the lesion of the NBM. A  
610 similar impairment of muscarinic receptors has been described in AD, where there is a loss of cortical  
611 cholinergic innervation accompanied by a depletion of the M<sub>2</sub> receptor<sup>70, 71</sup>. Low doses of WIN55,212-2  
612 restored both cortical AChE and M<sub>2</sub>/M<sub>4</sub> receptor activity. The lesion induced a non-significant trend  
613 towards reducing ACh levels, while low doses of WIN55,212-2 restored levels comparable to the control.  
614 In contrast, high doses of WIN55,212-2 significantly increased cortical ACh levels, surpassing those of  
615 the control group. In addition, WIN55,212-2 induced an increase in cortical free choline in control animals,  
616 where the cholinergic pathway was intact. It seems that, as mentioned earlier with the cognitive status,  
617 WIN55,212-2 also exhibit distinct effects on ACh and choline levels based on the state of the BFCNs.  
618 Thus, the cortical and subcortical ACh levels should be optimal for sustained attention, learning and  
619 memory<sup>72</sup>.

620 As for the eCB system, cortical CB<sub>1</sub> receptor activity increased after WIN55,212-2 treatment in the  
621 lesioned animals. A comparable upregulation of the eCB system has been reported in early stages of

622 patients with dementia<sup>22</sup>, indicating a compensatory response due to a loss of cholinergic innervation.  
623 This mechanism may play a role in the upregulation of cholinergic activity reported in the cortex of elderly  
624 people with mild cognitive impairment<sup>73, 74</sup>. We previously demonstrated an increase in cortical CB<sub>1</sub>  
625 receptor activity following the degeneration of BFCN in response to cholinergic damage one week after  
626 the lesion<sup>27</sup>. However, our current findings indicate that two weeks after the lesion, there is no effect on  
627 the cortical CB<sub>1</sub> receptor activity. During the progression of the lesion, the cannabinoid system primarily  
628 attempts to sustain balance by upregulating CB<sub>1</sub> receptors, but it fails to maintain them over time. The  
629 baso-cortical cholinergic pathway may require continuous stimulation of cortical CB<sub>1</sub> after the lesion to  
630 maintain proper memory functioning, as observed following the treatment with WIN55,212-2 in CB<sub>1</sub>  
631 receptor cortical activity.

632 In this study, we showed that post-injury, despite the loss of the majority of BFCNs, WIN55,212-2  
633 enhanced memory, likely by increasing cortical acetylcholine levels and maintaining the upregulation of  
634 CB<sub>1</sub> receptor activity. Previous studies showed that cannabinoids modulate acetylcholine release in the  
635 hippocampus and cortex<sup>24, 26, 75, 76</sup>. However, the specific mechanisms underlying these effects remain  
636 incompletely understood. In this context, our study aimed to investigate the factors contributing to the  
637 increase in cortical ACh levels. Since cholinergic neurons use choline to synthesize ACh, but also to  
638 synthesize certain phospholipids, such as phosphatidylcholines and sphingomyelins<sup>77</sup> we studied  
639 lipidomic changes following cannabinoid treatment using MALDI mass spectrometry.

640 Cortical lipidomic analysis revealed a significant decrease in some saturated and monounsaturated  
641 LPCs (LPC 18:0, LPC 18:1, and LPC 16:0) following the lesion. Our group had previously reported an  
642 increase in the production of these same LPCs with the activation of the muscarinic receptors<sup>28</sup>.  
643 Therefore, the reduction in cortical M<sub>2</sub>/M<sub>4</sub> receptor activity after the lesion may impact the levels of these  
644 LPCs. These choline-containing compounds are being investigated for their potential as cognitive  
645 enhancers<sup>11</sup> and play an inflammatory role due to their conversion to lysophosphatidic acid (LPA) and  
646 choline under the action of autotaxin<sup>78</sup>. These factors could offer alternative explanations for the  
647 reduction observed after the BFCN lesion; hence, maintaining the homeostasis of these molecules may  
648 be crucial for memory. Surprisingly, low doses of WIN55,212-2 restored these cortical LPCs to control  
649 levels, correlating with cognitive scores obtained in the BM. This supports the importance of maintaining  
650 cortical homeostasis for these molecules, although the mechanism of recovery for these LPCs was  
651 unknown.

652 To identify the lipidic changes induced by WIN55,212-2 associated with the restoration of cortical LPCs,  
653 correlations were performed between lipidomic data derived from the 192IgG-SAP group (showing  
654 decreased LPC levels) and the 192IgG-SAP+W group (where LPC levels were restored). Although low  
655 doses of WIN55,212-2 induced numerous changes in cortical lipidomic homeostasis, the most significant  
656 alterations were the decreases in SMs (SM 36:1, SM 36:2, SM 38:1, SM 38:2), which correlated with the



657 increased LPCs. The negative correlation observed between this type of lipids *in vivo* may suggest that  
658 SMs degradation induces the increment of LPCs. Choline plays a crucial role as a key metabolite  
659 necessary to maintain homeostasis between these two lipids<sup>79</sup>. Both LPCs and SMs are choline-  
660 containing lipids, although they do not directly share metabolic pathways<sup>80,81</sup>. In this sense, the selective  
661 vulnerability of BFCNs in various neurodegenerative diseases might result, in part, from an imbalance  
662 between these choline-containing lipids, as choline is used to synthesize both choline-containing lipids  
663 and ACh.

664 To better understand the homeostasis of these lipids and their relationship with choline, we incubated  
665 naive cortical rat brain tissue in specific buffers for two hours to measure choline levels and lipid  
666 composition *in vitro* within the same sample. The assay revealed that the increase in choline was  
667 accompanied by elevated LPCs and Cer/HexCer, as well as a decrease in SMs, similar changes to those  
668 observed after WIN55,212-2 administration *in vivo*. The strong correlation observed between choline  
669 and Cer/HexCer *in vitro* indicates that choline is specifically derived from the breakdown of cortical SMs.  
670 Sphingomyelinases, both acid and neutral, directly act by cleaving the phosphocholine group,  
671 transforming SM into ceramide<sup>82</sup>. Phosphocholine is a derivative of choline, which is crucial for the  
672 synthesis of ACh<sup>83</sup>. These results indicate that low doses of WIN55,212-2, through SM degradation,  
673 generate an alternative cortical choline source, as observed in control rats, used to increase both ACh  
674 and LPC levels. Similarly, the generation of ACh through PC decomposition has been described, but not  
675 through SM degradation<sup>76</sup>. This newly reported source of choline may originate from astrocytes, given  
676 that these SMs (SM 36:1, SM 36:2, SM 38:1, SM 38:2) are predominantly present in astrocytic  
677 membranes<sup>84,85</sup>, supporting earlier reports demonstrating cannabinoid-mediated breakdown of SMs  
678 in astrocytic cultures<sup>86-88</sup>. Collectively, these findings support our hypothesis regarding the memory  
679 enhancement mechanism in lesioned rats. Following BFCN degeneration, WIN55,212-2, through the  
680 continuous activation of CB<sub>1</sub> receptors in the cortex (possibly in astrocytes), triggers sphingomyelinase  
681 activation. This process generates ceramide and phosphocholine, ultimately producing free choline.  
682 Consequently, cortical levels of acetylcholine and LPCs experience an increase. This is reflected in  
683 restored AChE activity, M<sub>2</sub>/M<sub>4</sub> receptor activity, and their correlation with cognitive improvement.

684 The present findings indicate the need to maintain cortical choline-containing lipids, for the normal  
685 functioning of the cholinergic basal forebrain cortical projection system and cognition. Therefore,  
686 pharmacological modulation of the eCB system may represent a promising therapy for  
687 neurodegenerative disorders involving basal forebrain cholinergic degeneration, such as AD.

688

689

690 **REFERENCES**

- 691 1. Grothe, M.; Heinsen, H.; Teipel, S. J., Atrophy of the cholinergic Basal forebrain over the adult  
692 age range and in early stages of Alzheimer's disease. *Biological psychiatry* **2012**, *71* (9), 805-13.
- 693 2. Grothe, M.; Heinsen, H.; Teipel, S., Longitudinal measures of cholinergic forebrain atrophy in  
694 the transition from healthy aging to Alzheimer's disease. *Neurobiol Aging* **2013**, *34* (4), 1210-20.
- 695 3. Potter, P. E.; Rauschkolb, P. K.; Pandya, Y.; Sue, L. I.; Sabbagh, M. N.; Walker, D. G.;  
696 Beach, T. G., Pre- and post-synaptic cortical cholinergic deficits are proportional to amyloid plaque  
697 presence and density at preclinical stages of Alzheimer's disease. *Acta Neuropathol* **2011**, *122* (1),  
698 49-60.
- 699 4. Whitehouse, P. J.; Price, D. L.; Clark, A. W.; Coyle, J. T.; DeLong, M. R., Alzheimer disease:  
700 evidence for selective loss of cholinergic neurons in the nucleus basalis. *Ann Neurol* **1981**, *10* (2),  
701 122-6.
- 702 5. Moreta, M. P.; Burgos-Alonso, N.; Torrecilla, M.; Marco-Contelles, J.; Bruzos-Cidon, C.,  
703 Efficacy of Acetylcholinesterase Inhibitors on Cognitive Function in Alzheimer's Disease. Review of  
704 Reviews. *Biomedicines* **2021**, *9* (11).
- 705 6. Nemy, M.; Dyrba, M.; Brosseron, F.; Buerger, K.; Dechent, P.; Dobisch, L.; Ewers, M.;  
706 Fliessbach, K.; Glanz, W.; Goerss, D.; Heneka, M. T.; Hetzer, S.; Incesoy, E. I.; Janowitz, D.;  
707 Kilimann, I.; Laske, C.; Maier, F.; Munk, M. H.; Pemeczek, R.; Peters, O.; Preis, L.; Priller, J.;  
708 Rauchmann, B. S.; Roske, S.; Roy, N.; Scheffler, K.; Schneider, A.; Schott, B. H.; Spottke, A.;  
709 Spruth, E. J.; Wagner, M.; Wiltfang, J.; Yakupov, R.; Eriksdotter, M.; Westman, E.; Stepankova,  
710 O.; Vyslouzilova, L.; Duzel, E.; Jessen, F.; Teipel, S. J.; Ferreira, D., Cholinergic white matter  
711 pathways along the Alzheimer's disease continuum. *Brain* **2023**, *146* (5), 2075-2088.
- 712 7. Schumacher, J.; Ray, N. J.; Hamilton, C. A.; Bergamino, M.; Donaghy, P. C.; Firbank, M.;  
713 Watson, R.; Roberts, G.; Allan, L.; Barnett, N.; O'Brien, J. T.; Thomas, A. J.; Taylor, J. P., Free  
714 water imaging of the cholinergic system in dementia with Lewy bodies and Alzheimer's disease.  
715 *Alzheimers Dement* **2023**, *19* (10), 4549-4563.
- 716 8. Rossner, S., Cholinergic immunolesions by 192IgG-saporin--useful tool to simulate  
717 pathogenic aspects of Alzheimer's disease. *Int J Dev Neurosci* **1997**, *15* (7), 835-50.
- 718 9. Schliebs, R.; Rossner, S.; Bigl, V., Immunolesion by 192IgG-saporin of rat basal forebrain  
719 cholinergic system: a useful tool to produce cortical cholinergic dysfunction. *Prog Brain Res* **1996**,  
720 *109*, 253-64.
- 721 10. Oddo, S.; Caccamo, A.; Kitazawa, M.; Tseng, B. P.; LaFerla, F. M., Amyloid deposition  
722 precedes tangle formation in a triple transgenic model of Alzheimer's disease. *Neurobiol Aging* **2003**,  
723 *24* (8), 1063-70.
- 724 11. Tayebati, S. K.; Amenta, F., Choline-containing phospholipids: relevance to brain functional  
725 pathways. *Clin Chem Lab Med* **2013**, *51* (3), 513-21.
- 726 12. Blusztajn, J. K.; Wurtman, R. J., Choline and cholinergic neurons. *Science* **1983**, *221* (4611),  
727 614-20.
- 728 13. Shanks, H. R. C.; Onuska, K. M.; Barupal, D. K.; Schmitz, T. W.; Alzheimer's Disease  
729 Neuroimaging, I.; Alzheimer's Disease Metabolomics, C., Serum unsaturated phosphatidylcholines  
730 predict longitudinal basal forebrain degeneration in Alzheimer's disease. *Brain Commun* **2022**, *4* (6),  
731 fcac318.
- 732 14. Harkany, T.; Hartig, W.; Berghuis, P.; Dobszay, M. B.; Zilberter, Y.; Edwards, R. H.; Mackie,  
733 K.; Ernfors, P., Complementary distribution of type 1 cannabinoid receptors and vesicular glutamate  
734 transporter 3 in basal forebrain suggests input-specific retrograde signalling by cholinergic neurons.  
735 *Eur J Neurosci* **2003**, *18* (7), 1979-92.
- 736 15. Goonawardena, A. V.; Robinson, L.; Hampson, R. E.; Riedel, G., Cannabinoid and  
737 cholinergic systems interact during performance of a short-term memory task in the rat. *Learn Mem*  
738 **2010**, *17* (10), 502-11.
- 739 16. Puighermanal, E.; Busquets-Garcia, A.; Maldonado, R.; Ozaita, A., Cellular and intracellular  
740 mechanisms involved in the cognitive impairment of cannabinoids. *Philos Trans R Soc Lond B Biol*  
741 *Sci* **2012**, *367* (1607), 3254-63.

- 742 17. Urits, I.; Charipova, K.; Gress, K.; Li, N.; Berger, A. A.; Cornett, E. M.; Kassem, H.; Ngo,  
743 A. L.; Kaye, A. D.; Viswanath, O., Adverse Effects of Recreational and Medical Cannabis.  
744 *Psychopharmacol Bull* **2021**, *51* (1), 94-109.
- 745 18. Broyd, S. J.; van Hell, H. H.; Beale, C.; Yucel, M.; Solowij, N., Acute and Chronic Effects of  
746 Cannabinoids on Human Cognition-A Systematic Review. *Biological psychiatry* **2016**, *79* (7), 557-67.
- 747 19. Bilkei-Gorzo, A.; Albayram, O.; Draffehn, A.; Michel, K.; Piyanova, A.; Oppenheimer, H.;  
748 Dvir-Ginzberg, M.; Racz, I.; Ulas, T.; Imbeault, S.; Bab, I.; Schultze, J. L.; Zimmer, A., A chronic  
749 low dose of Delta(9)-tetrahydrocannabinol (THC) restores cognitive function in old mice. *Nat Med*  
750 **2017**, *23* (6), 782-787.
- 751 20. Calabrese, E. J.; Rubio-Casillas, A., Biphasic effects of THC in memory and cognition. *Eur J*  
752 *Clin Invest* **2018**, *48* (5), e12920.
- 753 21. Ozaita, A.; Aso, E., The cannabis paradox: when age matters. *Nat Med* **2017**, *23* (6), 661-662.
- 754 22. Manuel, I.; Gonzalez de San Roman, E.; Giralt, M. T.; Ferrer, I.; Rodriguez-Puertas, R.,  
755 Type-1 cannabinoid receptor activity during Alzheimer's disease progression. *Journal of Alzheimer's*  
756 *disease : JAD* **2014**, *42* (3), 761-6.
- 757 23. Ruver-Martins, A. C.; Bicca, M. A.; de Araujo, F. S.; de Noronha Sales Maia, B. H. L.;  
758 Pamplona, F. A.; da Silva, E. G.; Nascimento, F. P., Cannabinoid extract in microdoses ameliorates  
759 mnemonic and nonmnemonic Alzheimer's disease symptoms: a case report. *J Med Case Rep* **2022**,  
760 *16* (1), 277.
- 761 24. Gessa, G. L.; Casu, M. A.; Carta, G.; Mascia, M. S., Cannabinoids decrease acetylcholine  
762 release in the medial-prefrontal cortex and hippocampus, reversal by SR 141716A. *Eur J Pharmacol*  
763 **1998**, *355* (2-3), 119-24.
- 764 25. Gessa, G. L.; Mascia, M. S.; Casu, M. A.; Carta, G., Inhibition of hippocampal acetylcholine  
765 release by cannabinoids: reversal by SR 141716A. *Eur J Pharmacol* **1997**, *327* (1), R1-2.
- 766 26. Nava, F.; Carta, G.; Colombo, G.; Gessa, G. L., Effects of chronic Delta(9)-  
767 tetrahydrocannabinol treatment on hippocampal extracellular acetylcholine concentration and  
768 alternation performance in the T-maze. *Neuropharmacology* **2001**, *41* (3), 392-9.
- 769 27. Llorente-Ovejero, A.; Manuel, I.; Giralt, M. T.; Rodriguez-Puertas, R., Increase in cortical  
770 endocannabinoid signaling in a rat model of basal forebrain cholinergic dysfunction. *Neuroscience*  
771 **2017**, *362*, 206-218.
- 772 28. Llorente-Ovejero, A.; Martinez-Gardeazabal, J.; Moreno-Rodriguez, M.; Lombardero, L.;  
773 Gonzalez de San Roman, E.; Manuel, I.; Giralt, M. T.; Rodriguez-Puertas, R., Specific Phospholipid  
774 Modulation by Muscarinic Signaling in a Rat Lesion Model of Alzheimer's Disease. *ACS Chem*  
775 *Neurosci* **2021**, *12* (12), 2167-2181.
- 776 29. Koch, M.; Kreutz, S.; Bottger, C.; Grabiec, U.; Ghadban, C.; Korf, H. W.; Dehghani, F., The  
777 cannabinoid WIN 55,212-2-mediated protection of dentate gyrus granule cells is driven by CB1  
778 receptors and modulated by TRPA1 and Cav 2.2 channels. *Hippocampus* **2011**, *21* (5), 554-64.
- 779 30. Oddo, S.; Caccamo, A.; Shepherd, J. D.; Murphy, M. P.; Golde, T. E.; Kaye, R.; Metherate,  
780 R.; Mattson, M. P.; Akbari, Y.; LaFerla, F. M., Triple-transgenic model of Alzheimer's disease with  
781 plaques and tangles: intracellular Abeta and synaptic dysfunction. *Neuron* **2003**, *39* (3), 409-21.
- 782 31. Nair, A. B.; Jacob, S., A simple practice guide for dose conversion between animals and  
783 human. *J Basic Clin Pharm* **2016**, *7* (2), 27-31.
- 784 32. Martinez-Gardeazabal, J.; Moreno-Rodriguez, M.; de San Roman, E. G.; Abad, B.; Manuel,  
785 I.; Rodriguez-Puertas, R., Mass Spectrometry for the Advancement of Lipid Analysis in Alzheimer's  
786 Research. *Methods Mol Biol* **2023**, *2561*, 245-259.
- 787 33. Robichaud, G.; Garrard, K. P.; Barry, J. A.; Muddiman, D. C., MSiReader: an open-source  
788 interface to view and analyze high resolving power MS imaging files on Matlab platform. *J Am Soc*  
789 *Mass Spectrom* **2013**, *24* (5), 718-21.
- 790 34. Blank, M.; Enzlein, T.; Hopf, C., LPS-induced lipid alterations in microglia revealed by MALDI  
791 mass spectrometry-based cell fingerprinting in neuroinflammation studies. *Sci Rep* **2022**, *12* (1),  
792 2908.
- 793 35. Schweitzer, J. B., Nerve growth factor receptor-mediated transport from cerebrospinal fluid to  
794 basal forebrain neurons. *Brain Res* **1987**, *423* (1-2), 309-17.

- 795 36. Heckers, S.; Ohtake, T.; Wiley, R. G.; Lappi, D. A.; Geula, C.; Mesulam, M. M., Complete  
796 and selective cholinergic denervation of rat neocortex and hippocampus but not amygdala by an  
797 immunotoxin against the p75 NGF receptor. *J Neurosci* **1994**, *14* (3 Pt 1), 1271-89.
- 798 37. Barnes, C. A., Memory deficits associated with senescence: a neurophysiological and  
799 behavioral study in the rat. *J Comp Physiol Psychol* **1979**, *93* (1), 74-104.
- 800 38. Broadbent, N. J.; Gaskin, S.; Squire, L. R.; Clark, R. E., Object recognition memory and the  
801 rodent hippocampus. *Learn Mem* **2010**, *17* (1), 5-11.
- 802 39. Cummings, J. L.; Back, C., The cholinergic hypothesis of neuropsychiatric symptoms in  
803 Alzheimer's disease. *Am J Geriatr Psychiatry* **1998**, *6* (2 Suppl 1), S64-78.
- 804 40. Geula, C.; Dunlop, S. R.; Ayala, I.; Kawles, A. S.; Flanagan, M. E.; Gefen, T.; Mesulam, M.  
805 M., Basal forebrain cholinergic system in the dementias: Vulnerability, resilience, and resistance. *J*  
806 *Neurochem* **2021**, *158* (6), 1394-1411.
- 807 41. Muntsant, A.; Castillo-Ruiz, M. D. M.; Gimenez-Llort, L., Survival Bias, Non-Linear Behavioral  
808 and Cortico-Limbic Neuropathological Signatures in 3xTg-AD Mice for Alzheimer's Disease from  
809 Premorbid to Advanced Stages and Compared to Normal Aging. *Int J Mol Sci* **2023**, *24* (18).
- 810 42. Belfiore, R.; Rodin, A.; Ferreira, E.; Velazquez, R.; Branca, C.; Caccamo, A.; Oddo, S.,  
811 Temporal and regional progression of Alzheimer's disease-like pathology in 3xTg-AD mice. *Aging Cell*  
812 **2019**, *18* (1), e12873.
- 813 43. Stover, K. R.; Campbell, M. A.; Van Winssen, C. M.; Brown, R. E., Early detection of cognitive  
814 deficits in the 3xTg-AD mouse model of Alzheimer's disease. *Behav Brain Res* **2015**, *289*, 29-38.
- 815 44. Perez, S. E.; He, B.; Muhammad, N.; Oh, K. J.; Fahnestock, M.; Ikonovic, M. D.; Mufson,  
816 E. J., Cholinergic basal forebrain system alterations in 3xTg-AD transgenic mice. *Neurobiol Dis*  
817 **2011**, *41* (2), 338-52.
- 818 45. Jeon, P.; Yang, S.; Jeong, H.; Kim, H., Cannabinoid receptor agonist protects cultured  
819 dopaminergic neurons from the death by the proteasomal dysfunction. *Anat Cell Biol* **2011**, *44* (2),  
820 135-42.
- 821 46. Su, S. H.; Wang, Y. Q.; Wu, Y. F.; Wang, D. P.; Lin, Q.; Hai, J., Cannabinoid receptor  
822 agonist WIN55,212-2 and fatty acid amide hydrolase inhibitor URB597 may protect against cognitive  
823 impairment in rats of chronic cerebral hypoperfusion via PI3K/AKT signaling. *Behav Brain Res* **2016**,  
824 *313*, 334-344.
- 825 47. Su, S. H.; Wu, Y. F.; Lin, Q.; Yu, F.; Hai, J., Cannabinoid receptor agonist WIN55,212-2 and  
826 fatty acid amide hydrolase inhibitor URB597 suppress chronic cerebral hypoperfusion-induced  
827 neuronal apoptosis by inhibiting c-Jun N-terminal kinase signaling. *Neuroscience* **2015**, *301*, 563-75.
- 828 48. Kohut, S. J.; Cao, L.; Mintzopolous, D.; Jiang, S.; Nikas, S. P.; Makriyannis, A.; Zou, C. S.;  
829 Jensen, J. E.; Frederick, B. B.; Bergman, J.; Kangas, B. D., Effects of cannabinoid exposure on  
830 short-term memory and medial orbitofrontal cortex function and chemistry in adolescent female  
831 rhesus macaques. *Front Neurosci* **2022**, *16*, 998351.
- 832 49. Zhou, F. W.; Puche, A. C., Short-Term Plasticity in Cortical GABAergic Synapses on Olfactory  
833 Bulb Granule Cells Is Modulated by Endocannabinoids. *Front Cell Neurosci* **2021**, *15*, 629052.
- 834 50. Hampson, R. E.; Deadwyler, S. A., Role of cannabinoid receptors in memory storage.  
835 *Neurobiol Dis* **1998**, *5* (6 Pt B), 474-82.
- 836 51. Hoffman, A. F.; Oz, M.; Yang, R.; Lichtman, A. H.; Lupica, C. R., Opposing actions of chronic  
837 Delta9-tetrahydrocannabinol and cannabinoid antagonists on hippocampal long-term potentiation.  
838 *Learn Mem* **2007**, *14* (1-2), 63-74.
- 839 52. Brodtkin, J.; Moerschbaecher, J. M., SR141716A antagonizes the disruptive effects of  
840 cannabinoid ligands on learning in rats. *J Pharmacol Exp Ther* **1997**, *282* (3), 1526-32.
- 841 53. Ferrari, F.; Ottani, A.; Vivoli, R.; Giuliani, D., Learning impairment produced in rats by the  
842 cannabinoid agonist HU 210 in a water-maze task. *Pharmacol Biochem Behav* **1999**, *64* (3), 555-61.
- 843 54. Varvel, S. A.; Hamm, R. J.; Martin, B. R.; Lichtman, A. H., Differential effects of delta 9-THC  
844 on spatial reference and working memory in mice. *Psychopharmacology (Berl)* **2001**, *157* (2), 142-  
845 50.
- 846 55. Galanopoulos, A.; Polissidis, A.; Georgiadou, G.; Papadopoulou-Daifoti, Z.; Nomikos, G.  
847 G.; Pitsikas, N.; Antoniou, K., WIN55,212-2 impairs non-associative recognition and spatial memory  
848 in rats via CB1 receptor stimulation. *Pharmacol Biochem Behav* **2014**, *124*, 58-66.



- 849 56. Schneider, M.; Schomig, E.; Leweke, F. M., Acute and chronic cannabinoid treatment  
850 differentially affects recognition memory and social behavior in pubertal and adult rats. *Addict Biol*  
851 **2008**, *13* (3-4), 345-57.
- 852 57. Nitzan, K.; Ellenbogen, L.; Bentulila, Z.; David, D.; Franko, M.; Break, E. P.; Zoharetz, M.;  
853 Shamir, A.; Same, Y.; Doron, R., An Ultra-Low Dose of  $\Delta^9$ -Tetrahydrocannabinol Alleviates  
854 Alzheimer's Disease-Related Cognitive Impairments and Modulates TrkB Receptor Expression in a  
855 5XFAD Mouse Model. *Int J Mol Sci* **2022**, *23* (16).
- 856 58. Sarne, Y., Beneficial and deleterious effects of cannabinoids in the brain: the case of ultra-low  
857 dose THC. *Am J Drug Alcohol Abuse* **2019**, *45* (6), 551-562.
- 858 59. Seeger, G.; Hartig, W.; Rossner, S.; Schliebs, R.; Bruckner, G.; Bigl, V.; Brauer, K., Electron  
859 microscopic evidence for microglial phagocytic activity and cholinergic cell death after administration  
860 of the immunotoxin 192IgG-saporin in rat. *J Neurosci Res* **1997**, *48* (5), 465-76.
- 861 60. Janecki, M.; Graczyk, M.; Lewandowska, A. A.; Pawlak, L., Anti-Inflammatory and Antiviral  
862 Effects of Cannabinoids in Inhibiting and Preventing SARS-CoV-2 Infection. *Int J Mol Sci* **2022**, *23*  
863 (8).
- 864 61. Llorente-Ovejero, A.; Bengoetxea de Tena, I.; Martínez-Gardeazabal, J.; Moreno-Rodríguez,  
865 M.; Lombardero, L.; Manuel, I.; Rodríguez-Puertas, R., Cannabinoid Receptors and Glial Response  
866 Following a Basal Forebrain Cholinergic Lesion. *ACS pharmacology & translational science* **2022**, *5*  
867 (9), 791-802.
- 868 62. Chung, E. S.; Bok, E.; Chung, Y. C.; Baik, H. H.; Jin, B. K., Cannabinoids prevent  
869 lipopolysaccharide-induced neurodegeneration in the rat substantia nigra in vivo through inhibition of  
870 microglial activation and NADPH oxidase. *Brain Res* **2012**, *1451*, 110-6.
- 871 63. Spyridakos, D.; Papadogkonaki, S.; Dionysopoulou, S.; Mastrodimou, N.; Polioudaki, H.;  
872 Thermos, K., Effect of acute and subchronic administration of (R)-WIN55,212-2 induced  
873 neuroprotection and anti inflammatory actions in rat retina: CB1 and CB2 receptor involvement.  
874 *Neurochem Int* **2021**, *142*, 104907.
- 875 64. Jurga, A. M.; Paleczna, M.; Kuter, K. Z., Overview of General and Discriminating Markers of  
876 Differential Microglia Phenotypes. *Front Cell Neurosci* **2020**, *14*, 198.
- 877 65. Facchinetti, F.; Del Giudice, E.; Furegato, S.; Passarotto, M.; Leon, A., Cannabinoids ablate  
878 release of TNFalpha in rat microglial cells stimulated with lipopolysaccharide. *Glia* **2003**, *41* (2), 161-  
879 8.
- 880 66. Rock, R. B.; Gekker, G.; Hu, S.; Sheng, W. S.; Cabral, G. A.; Martin, B. R.; Peterson, P.  
881 K., WIN55,212-2-mediated inhibition of HIV-1 expression in microglial cells: involvement of  
882 cannabinoid receptors. *J Neuroimmune Pharmacol* **2007**, *2* (2), 178-83.
- 883 67. Young, A. P.; Denovan-Wright, E. M., Synthetic cannabinoids reduce the inflammatory activity  
884 of microglia and subsequently improve neuronal survival in vitro. *Brain Behav Immun* **2022**, *105*, 29-  
885 43.
- 886 68. Llorente-Ovejero, A.; Manuel, I.; Lombardero, L.; Giralt, M. T.; Ledent, C.; Gimenez-Llort,  
887 L.; Rodriguez-Puertas, R., Endocannabinoid and Muscarinic Signaling Crosstalk in the 3xTg-AD  
888 Mouse Model of Alzheimer's Disease. *Journal of Alzheimer's disease : JAD* **2018**, *64* (1), 117-136.
- 889 69. Thompson, K. J.; Tobin, A. B., Crosstalk between the M(1) muscarinic acetylcholine receptor  
890 and the endocannabinoid system: A relevance for Alzheimer's disease? *Cell Signal* **2020**, *70*, 109545.
- 891 70. Mufson, E. J.; Counts, S. E.; Perez, S. E.; Ginsberg, S. D., Cholinergic system during the  
892 progression of Alzheimer's disease: therapeutic implications. *Expert Rev Neurother* **2008**, *8* (11),  
893 1703-18.
- 894 71. Rodriguez-Puertas, R.; Pascual, J.; Vilaro, T.; Pazos, A., Autoradiographic distribution of M1,  
895 M2, M3, and M4 muscarinic receptor subtypes in Alzheimer's disease. *Synapse* **1997**, *26* (4), 341-  
896 50.
- 897 72. Mineur Y.S.; Picciotto M.R., The role of acetylcholine in negative encoding bias: Too much of  
898 a good thing?. *Eur J Neurosci.* **2021**, *53*(1),114-125.
- 899 73. DeKosky, S. T.; Ikonovic, M. D.; Styren, S. D.; Beckett, L.; Wisniewski, S.; Bennett, D.  
900 A.; Cochran, E. J.; Kordower, J. H.; Mufson, E. J., Upregulation of choline acetyltransferase activity  
901 in hippocampus and frontal cortex of elderly subjects with mild cognitive impairment. *Ann Neurol* **2002**,  
902 *51* (2), 145-55.



- 903 74. Ikonovic, M. D.; Mufson, E. J.; Wu, J.; Cochran, E. J.; Bennett, D. A.; DeKosky, S. T.,  
904 Cholinergic plasticity in hippocampus of individuals with mild cognitive impairment: correlation with  
905 Alzheimer's neuropathology. *Journal of Alzheimer's disease : JAD* **2003**, *5* (1), 39-48.
- 906 75. Murillo-Rodriguez, E.; Arankowsky-Sandoval, G.; Rocha, N. B.; Peniche-Amante, R.; Veras,  
907 A. B.; Machado, S.; Budde, H., Systemic Injections of Cannabidiol Enhance Acetylcholine Levels  
908 from Basal Forebrain in Rats. *Neurochem Res* **2018**, *43* (8), 1511-1518.
- 909 76. Tzavara, E. T.; Wade, M.; Nomikos, G. G., Biphasic effects of cannabinoids on acetylcholine  
910 release in the hippocampus: site and mechanism of action. *The Journal of neuroscience : the official*  
911 *journal of the Society for Neuroscience* **2003**, *23* (28), 9374-84.
- 912 77. Blusztajn, J. K.; Liscovitch, M.; Richardson, U. I., Synthesis of acetylcholine from choline  
913 derived from phosphatidylcholine in a human neuronal cell line. *Proc Natl Acad Sci U S A* **1987**, *84*  
914 (15), 5474-7.
- 915 78. She, S.; Zhang, Q.; Shi, J.; Yang, F.; Dai, K., Roles of Autotaxin/Autotaxin-Lysophosphatidic  
916 Acid Axis in the Initiation and Progression of Liver Cancer. *Front Oncol* **2022**, *12*, 922945.
- 917 79. Javaid, S.; Farooq, T.; Rehman, Z.; Afzal, A.; Ashraf, W.; Rasool, M. F.; Alqahtani, F.;  
918 Alsanea, S.; Alasmari, F.; Alanazi, M. M.; Alharbi, M.; Imran, I., Dynamics of Choline-Containing  
919 Phospholipids in Traumatic Brain Injury and Associated Comorbidities. *Int J Mol Sci* **2021**, *22* (21).
- 920 80. Loft, L. M. I.; Moseholm, K. F.; Pedersen, K. K. W.; Jensen, M. K.; Koch, M.; Cronje, H. T.,  
921 Sphingomyelins and ceramides: possible biomarkers for dementia? *Curr Opin Lipidol* **2022**, *33* (1),  
922 57-67.
- 923 81. Okudaira, S.; Yukiura, H.; Aoki, J., Biological roles of lysophosphatidic acid signaling through  
924 its production by autotaxin. *Biochimie* **2010**, *92* (6), 698-706.
- 925 82. Ong, W. Y.; Herr, D. R.; Farooqui, T.; Ling, E. A.; Farooqui, A. A., Role of sphingomyelinases  
926 in neurological disorders. *Expert Opin Ther Targets* **2015**, *19* (12), 1725-42.
- 927 83. Zeisel, S. H.; Klatt, K. C.; Caudill, M. A., Choline. *Adv Nutr* **2018**, *9* (1), 58-60.
- 928 84. Fitzner, D.; Bader, J. M.; Penkert, H.; Bergner, C. G.; Su, M.; Weil, M. T.; Surma, M. A.;  
929 Mann, M.; Klose, C.; Simons, M., Cell-Type- and Brain-Region-Resolved Mouse Brain Lipidome. *Cell*  
930 *Rep* **2020**, *32* (11), 108132.
- 931 85. Martínez-Gardeazabal J.; Moreno-Rodríguez M.; Llorente-Ovejero A.; González de San  
932 Román E.; Lombardero L.; Bengoetxea de Tena I.; Sustacha J.; Matute C.; Manuel I.; Bonifazi P.;  
933 Rodríguez-Puertas R., Cell lipotypes localization in brain by mass spectrometry imaging. *bioRxiv*;  
934 **2024**.
- 935 86. Blazquez, C.; Sanchez, C.; Daza, A.; Galve-Roperh, I.; Guzman, M., The stimulation of  
936 ketogenesis by cannabinoids in cultured astrocytes defines carnitine palmitoyltransferase I as a new  
937 ceramide-activated enzyme. *J Neurochem* **1999**, *72* (4), 1759-68.
- 938 87. Guzman, M.; Galve-Roperh, I.; Sanchez, C., Ceramide: a new second messenger of  
939 cannabinoid action. *Trends Pharmacol Sci* **2001**, *22* (1), 19-22.
- 940 88. Velasco, G.; Galve-Roperh, I.; Sanchez, C.; Blazquez, C.; Haro, A.; Guzman, M.,  
941 Cannabinoids and ceramide: two lipids acting hand-by-hand. *Life Sci* **2005**, *77* (14), 1723-31.

## 942 **ACKNOWLEDGEMENTS**

943 Technical and human support provided by University of the Basque Country (UPV/EHU), Ministry of  
944 Economy and Competitiveness (MINECO), Basque Government (GV/EJ), European Regional  
945 Development Fund (ERDF), and European Social Fund (ESF) is gratefully acknowledged. J.M.-G. is  
946 the recipient of "Margarita Salas" fellowship and I. B de T. of an "Investigo" fellowship funded by the  
947 European Union-Next Generation EU. The authors would also like to show gratitude to Dr. Elliott J.  
948 Mufson and Dr. Sylvia E. Perez from the Barrow Neurological Institute for their assistance with paper  
949 revisions and editing.

951 **FUNDING**

952 This work was supported by grants from the regional Basque Government IT1454-22 to the  
953 “Neurochemistry and Neurodegeneration” consolidated research group and by Instituto de Salud  
954 Carlos III through the project “PI20/00153” (co-funded by European Regional Development Fund “A  
955 way to make Europe”) and by BIOEF project BIO22/ALZ/010 funded by Eitb Maratoia.

956 **AUTHOR CONTRIBUTIONS**

957 M.M.-R and R.R.-P. conceived and designed the study, performed the statistical analysis, and wrote  
958 the manuscript. A.L.-O and L.L. contributed to organotypic cultures studies, such as developing an *ex*  
959 *vivo* model of cholinergic lesion and *in vitro* treatments. J.M.-G., M.M.-R. and E.G.d.S.R. contributed  
960 to the performance of MALDI-MSI experimental procedures and data analysis. M.M.-R, J.M.-G and  
961 I.B.d.T. performed the *in vivo* studies, such as surgeries, treatments, and behavioral tests. M.M.-R,  
962 J.M.-G and I.M. performed autoradiographic studies. M.M.-R performed acetylcholinesterase activity,  
963 acetylcholine, and choline assays. M.M.-R and J.M.-G. performed the lipidomic analysis in incubated  
964 and non-incubated samples by MALDI. All authors contributed to the manuscript revision, read, and  
965 approved the submitted version.

966 **COMPETING INTERESTS**

967 The authors declare that the following spanish patent related to the present work has been registered:  
968 *Tratamiento de la demencia con agonistas cannabinoides. Spain. 02-03-2017. University of the*  
969 *Basque Country. ES2638057.*

970 **Data and material availability**

971 The data that support the findings of this study are available from the corresponding author upon  
972 reasonable request. Some data may not be made available because of privacy or ethical restrictions.

973

974

975

976

977

978

979

980

981

982

983

984 **Supplementary information**

985

986 **Cortical choline-containing lipids facilitate cognition**  
987 **restoration via cannabinoid receptors**

988 Marta Moreno-Rodríguez<sup>1\*</sup>, Jonatan Martínez-Gardeazabal<sup>1</sup>, Iker Bengoetxea de Tena<sup>1</sup>, Alberto Llorente-Ovejero<sup>1</sup>, Laura Lombardero<sup>1</sup>,  
989 Estibaliz González de San Román<sup>1</sup>, Lydia Giménez-Llort<sup>2</sup>, Iván Manuel<sup>1,3</sup>, Rafael Rodríguez-Puertas<sup>1,3\*</sup>

990 <sup>1</sup>Department of Pharmacology, Faculty of Medicine and Nursing. University of the Basque Country (UPV/EHU), Leioa, Spain.

991 <sup>2</sup>Department of Psychiatry and Forensic Medicine, School of Medicine & Institute of Neuroscience, Autonomous University of Barcelona  
992 (UAB), Barcelona, Spain.

993 <sup>3</sup>Neurodegenerative Diseases, BioBizkaia Health Research Institute, Barakaldo, Spain.

994

995 \*Corresponding author email: [rafael.rodriquez@ehu.es](mailto:rafael.rodriquez@ehu.es) [marta.morenor@ehu.eus](mailto:marta.morenor@ehu.eus)

996

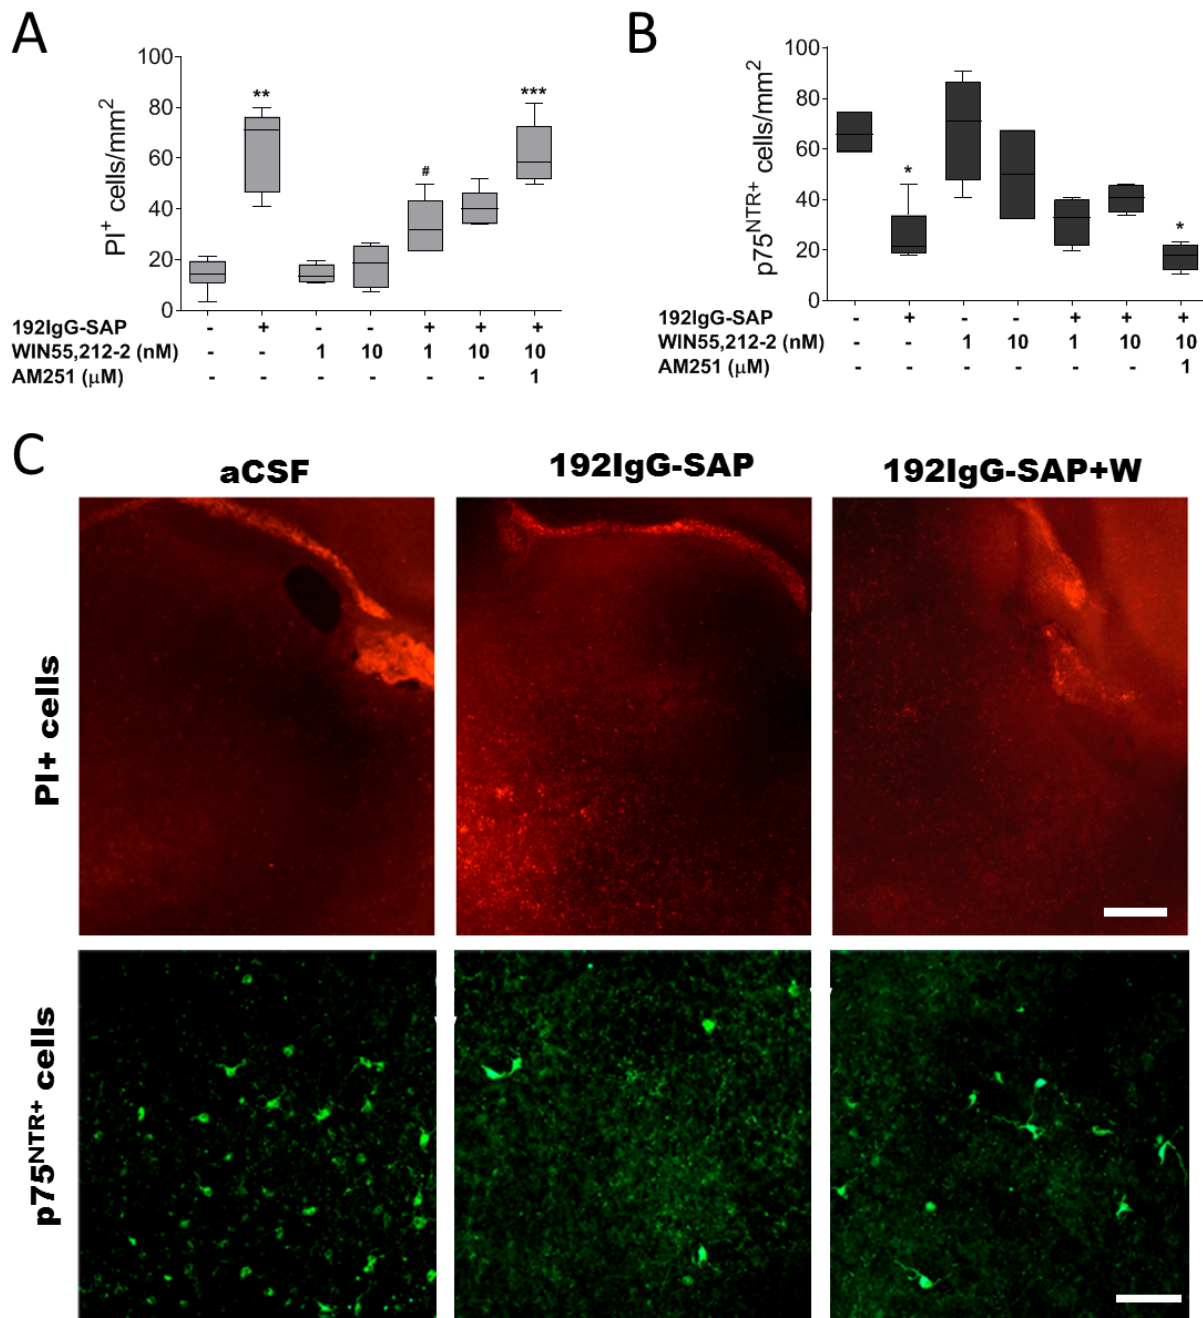

997

998 **Supplementary Figure 1. Ex vivo model of organotypic culture treated with 192IgG-saporin and**  
 999 **WIN55,212-2. (A).** Number of PI<sup>+</sup> cells and **(B).** p75<sup>NTR+</sup> cells in organotypic cultures in the absence  
 1000 or presence of 100 ng/ml of 192 IgG-saporin, cannabinoid agonist WIN55,212-2 (1 or 10 nM) and  
 1001 antagonist AM251 (1 μM) in NBM (Kruskal-Wallis test, *post-hoc* test Dunn's multiple comparison  
 1002 \*\**p*<0.01 vs CONTROL, #*p*<0.05 vs 192IgG-SAP. **PI:** *n*=7 CONTROL; *n*=4 C+W(1nM); *n*=4  
 1003 C+W(10nM); *n*=6 192IgG-SAP; *n*=6 192IgG-SAP+W(1nM); *n*=5 192IgG-SAP+W(10nM); *n*=6 192IgG-  
 1004 SAP+W+AM251. **p75<sup>NTR+</sup>:** *n*=5 CONTROL; *n*=4 C+W(1nM); *n*=4 C+W(10nM); *n*=4 192IgG-SAP; *n*=4  
 1005 192IgG-SAP+W(1nM); *n*=4 192IgG-SAP+W(10nM); *n*=4 192IgG-SAP+W+AM251. **(C).**  
 1006 Representative images of PI<sup>+</sup> cells (red) and p75<sup>NTR+</sup> (green) immunoreactivity in NBM of control,  
 1007 192IgG-SAP and 192IgG-SAP+W(1nM). PI<sup>+</sup> cell Scale bar = 200 μm and p75<sup>NTR</sup> scale bar = 40 μm.



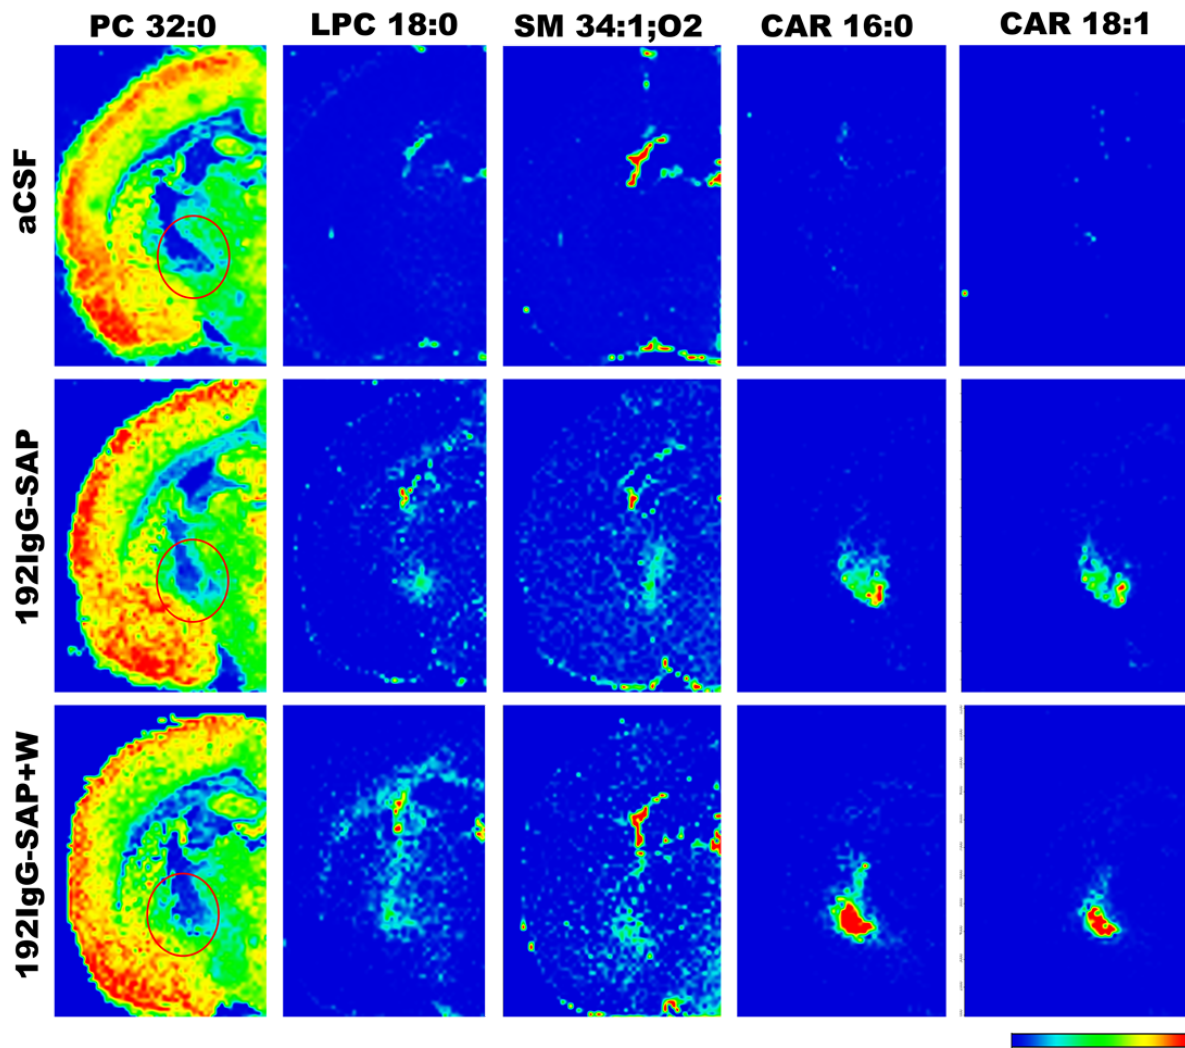

008

009 **Supplementary Figure 2. Matrix-assisted laser desorption ionization mass spectrometry**  
010 **imaging (MALDI-MSI) of inflammation-associated lipids in brain coronal slices of Control,**  
011 **192IgG-SAP and 192IgG-SAP+W0.5 group.** Red circles indicate the lesion site, where lipids related  
012 to inflammation-associated microglia were measured. Note that lysophosphatidylcholine (LPC 18:0),  
013 sphingomyelin (SM 34:1), palmitoylcarnitine (CAR 16:0) and oleoylcarnitine (CAR 18:1) levels  
014 increased specifically at the lesion site.  $n=5$ .

Supplementary material

Table 1. Absolute intensity of inflammation-associated lipid species biomarkers in microglia in the lesion site after low doses of WIN55,212-2 in positive mode.

| Assignment                                                  | Cal m/z  | Exp m/z  | CONTROL                       | 192IGg-SAP                    | CONTROL+W0.5                  | 192IGg-SAP+W0.5               |
|-------------------------------------------------------------|----------|----------|-------------------------------|-------------------------------|-------------------------------|-------------------------------|
| LPC O-16:0[M+H] <sup>+</sup>                                | 482.3605 | 482.3623 | 2545 ± 970                    | 5232 ± 2204                   | 6583 ± 2720                   | 9267 ± 3043                   |
| LPC 16:0 [M+H] <sup>+</sup>                                 | 496.3398 | 496.3415 | 213258 ± 12803                | 296546 ± 27758                | 189738 ± 23642                | 245438 ± 30677                |
| LPC 16:0 [M+Na] <sup>+</sup>                                | 518.3217 | 518.3237 | 2373 ± 875                    | 3989 ± 1528                   | 3291 ± 762                    | 4313 ± 1014                   |
| LPC 18:0 [M+H] <sup>+</sup>                                 | 524.3711 | 524.3730 | 55207 ± 13922                 | 144700 ± 19651*               | 83098 ± 13201                 | 132257 ± 10238                |
| LPC 16:0 [M+K] <sup>+</sup>                                 | 534.2956 | 534.2978 | 13808 ± 3085                  | 51672 ± 14782*                | 34680 ± 11128                 | 57686 ± 13633                 |
| LPC 18:0 [M+K] <sup>+</sup>                                 | 562.3278 | 562.3289 | 3486 ± 1312                   | 24647 ± 4448*                 | 16286 ± 7514                  | 23697 ± 4108                  |
| DG 34:0 [M+H-H <sub>2</sub> O] <sup>+</sup>                 | 579.5347 | 579.5345 | 75434 ± 28780                 | 54819 ± 15955                 | 47509 ± 15491                 | 55641 ± 18476                 |
| Cer 42:1;O <sub>2</sub> [M+H-H <sub>2</sub> O] <sup>+</sup> | 632.6340 | 632.6358 | 5793 ± 2008                   | 5870 ± 1717                   | 14170 ± 1850*                 | 8458 ± 1933                   |
| PC 32:0 [M+H] <sup>+</sup>                                  | 734.5694 | 734.5722 | 2.07*10 <sup>6</sup> ± 475451 | 730389 ± 206873               | 1.07*10 <sup>6</sup> ± 269945 | 979923 ± 208596               |
| PC 32:0 [M+Na] <sup>+</sup>                                 | 756.5513 | 756.5543 | 912569 ± 279206               | 842267 ± 79401                | 586950 ± 111616               | 592423 ± 64619                |
| PC 32:0 [M+K] <sup>+</sup>                                  | 772.5253 | 772.5278 | 3.32*10 <sup>6</sup> ± 499928 | 2.59*10 <sup>6</sup> ± 213702 | 2.66*10 <sup>6</sup> ± 270507 | 2.54*10 <sup>6</sup> ± 247160 |
| PC 34:0 [M+K] <sup>+</sup>                                  | 800.5578 | 800.5566 | 488070 ± 102509               | 525862 ± 148953               | 521543 ± 107415               | 556673 ± 107250               |
| SM 34:1;O <sub>2</sub> [M+K] <sup>+</sup>                   | 741.5307 | 741.5333 | 14531 ± 4591                  | 38556 ± 4956*                 | 20205 ± 3815                  | 34127 ± 8424                  |
| CAR 16:0 [M+H] <sup>+</sup>                                 | 400.3421 | 400.3434 | 9893 ± 4149                   | 65156 ± 8637*                 | 102026 ± 30789                | 424809 ± 59210#               |
| CAR 18:1 [M+H] <sup>+</sup>                                 | 426.3578 | 426.3585 | 8120 ± 5517                   | 57604 ± 15119*                | 65605 ± 34259                 | 421720 ± 93521#               |

Data are mean ± S.E.M values of absolute intensity of Control (n = 5), 192IGg-SAP (n = 5), Control+W0.5 (n=5), 192IGg-SAP+W0.5 (n = 5) groups. Kruskal–Wallis test, *post-hoc* test Dunn's multiple comparison \**p*<0.05 vs Control, #*p*<0.05 vs 192IgG-SAP. PC: phosphatidylcholine; DG: diacylglycerol, SM: sphingomyelin, CER: ceramide, LPC: phosphatidylcholine and CAR: carnitine; Cal: calculated; Exp: experiment

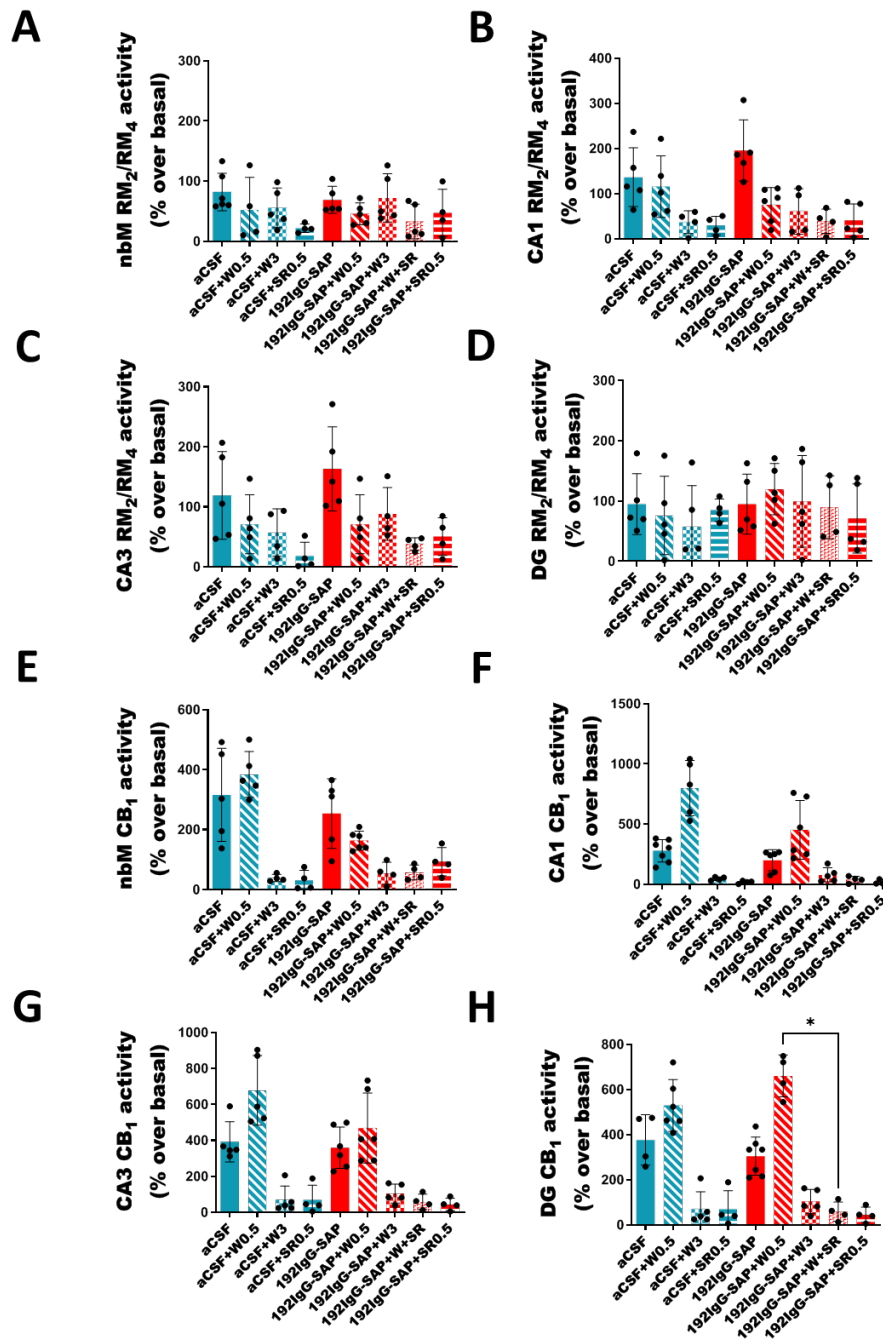

**Supplementary Figure 3. Functional autoradiographic studies of mAChR M<sub>2</sub>/M<sub>4</sub> and CB<sub>1</sub> receptors in NBM and hippocampal areas of all the experimental groups.** (A) mAChR M<sub>2</sub>/M<sub>4</sub> activity in the NBM (B) mAChR M<sub>2</sub>/M<sub>4</sub> activity in the CA3 of the hippocampus. (C) mAChR M<sub>2</sub>/M<sub>4</sub> activity in the CA1 of the hippocampus. (D) mAChR M<sub>2</sub>/M<sub>4</sub> activity in the dentate gyrus (DG) of the hippocampus. (E) CB<sub>1</sub> receptor activity in the NBM (F) CB<sub>1</sub> receptor activity in the CA3 of the hippocampus. (G) CB<sub>1</sub> receptor activity in the CA1 of the hippocampus. (H) CB<sub>1</sub> receptor activity in the dentate gyrus (DG) of the hippocampus. Note that there are no significant differences between the aCSF and 192IgG-SAP groups, as well as between the 192IgG-SAP and 192IgG-SAP+W0.5 groups.
